# Supplementary material for: Mutations primarily alter the inclusion of alternatively spliced exons
Source: eLife journal article supplement (doi:10.7554/elife.59959), 2020-10-28

**A** $\Delta$ PSI distributions predicted using FAS dataset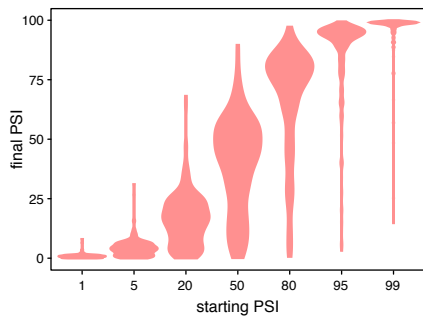**B** $\Delta$ PSI distributions predicted using WT1B dataset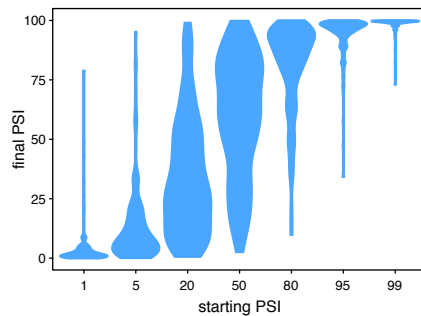**C** $\Delta$ PSI distributions predicted using WT1C dataset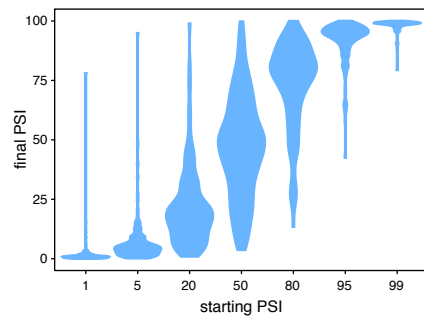**D** $\Delta$ PSI distributions predicted using WT1F dataset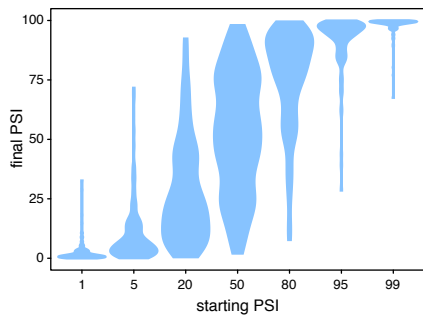**E** $\Delta$ PSI distributions predicted using WT1H dataset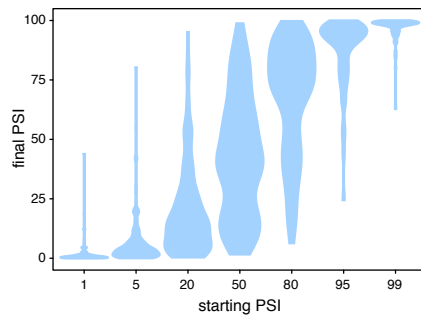**F** $\Delta$ PSI distributions predicted using WT1I dataset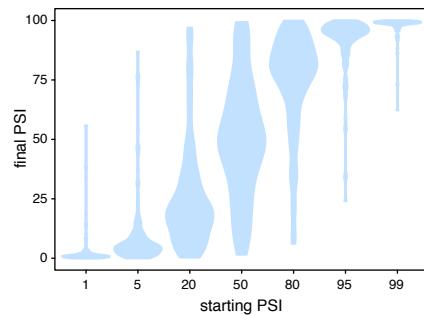

Supplement: supp [file elife-59959-supp-v1.zip]
