# Supplementary material for: Mutations primarily alter the inclusion of alternatively spliced exons
Source: eLife journal article supplement (doi:10.7554/elife.59959), 2020-10-28

# A distribution of nucleotide inclusion levels

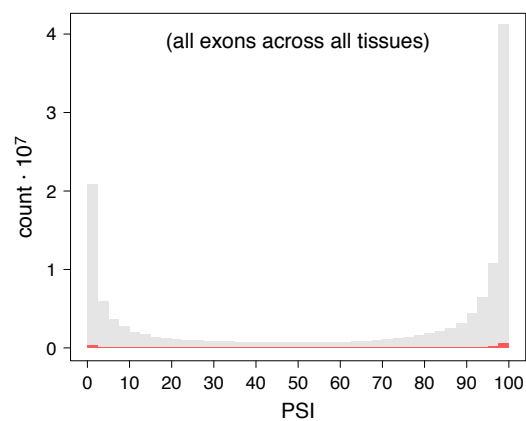

# B distribution of nucleotide inclusion levels (all exons split by tissues)

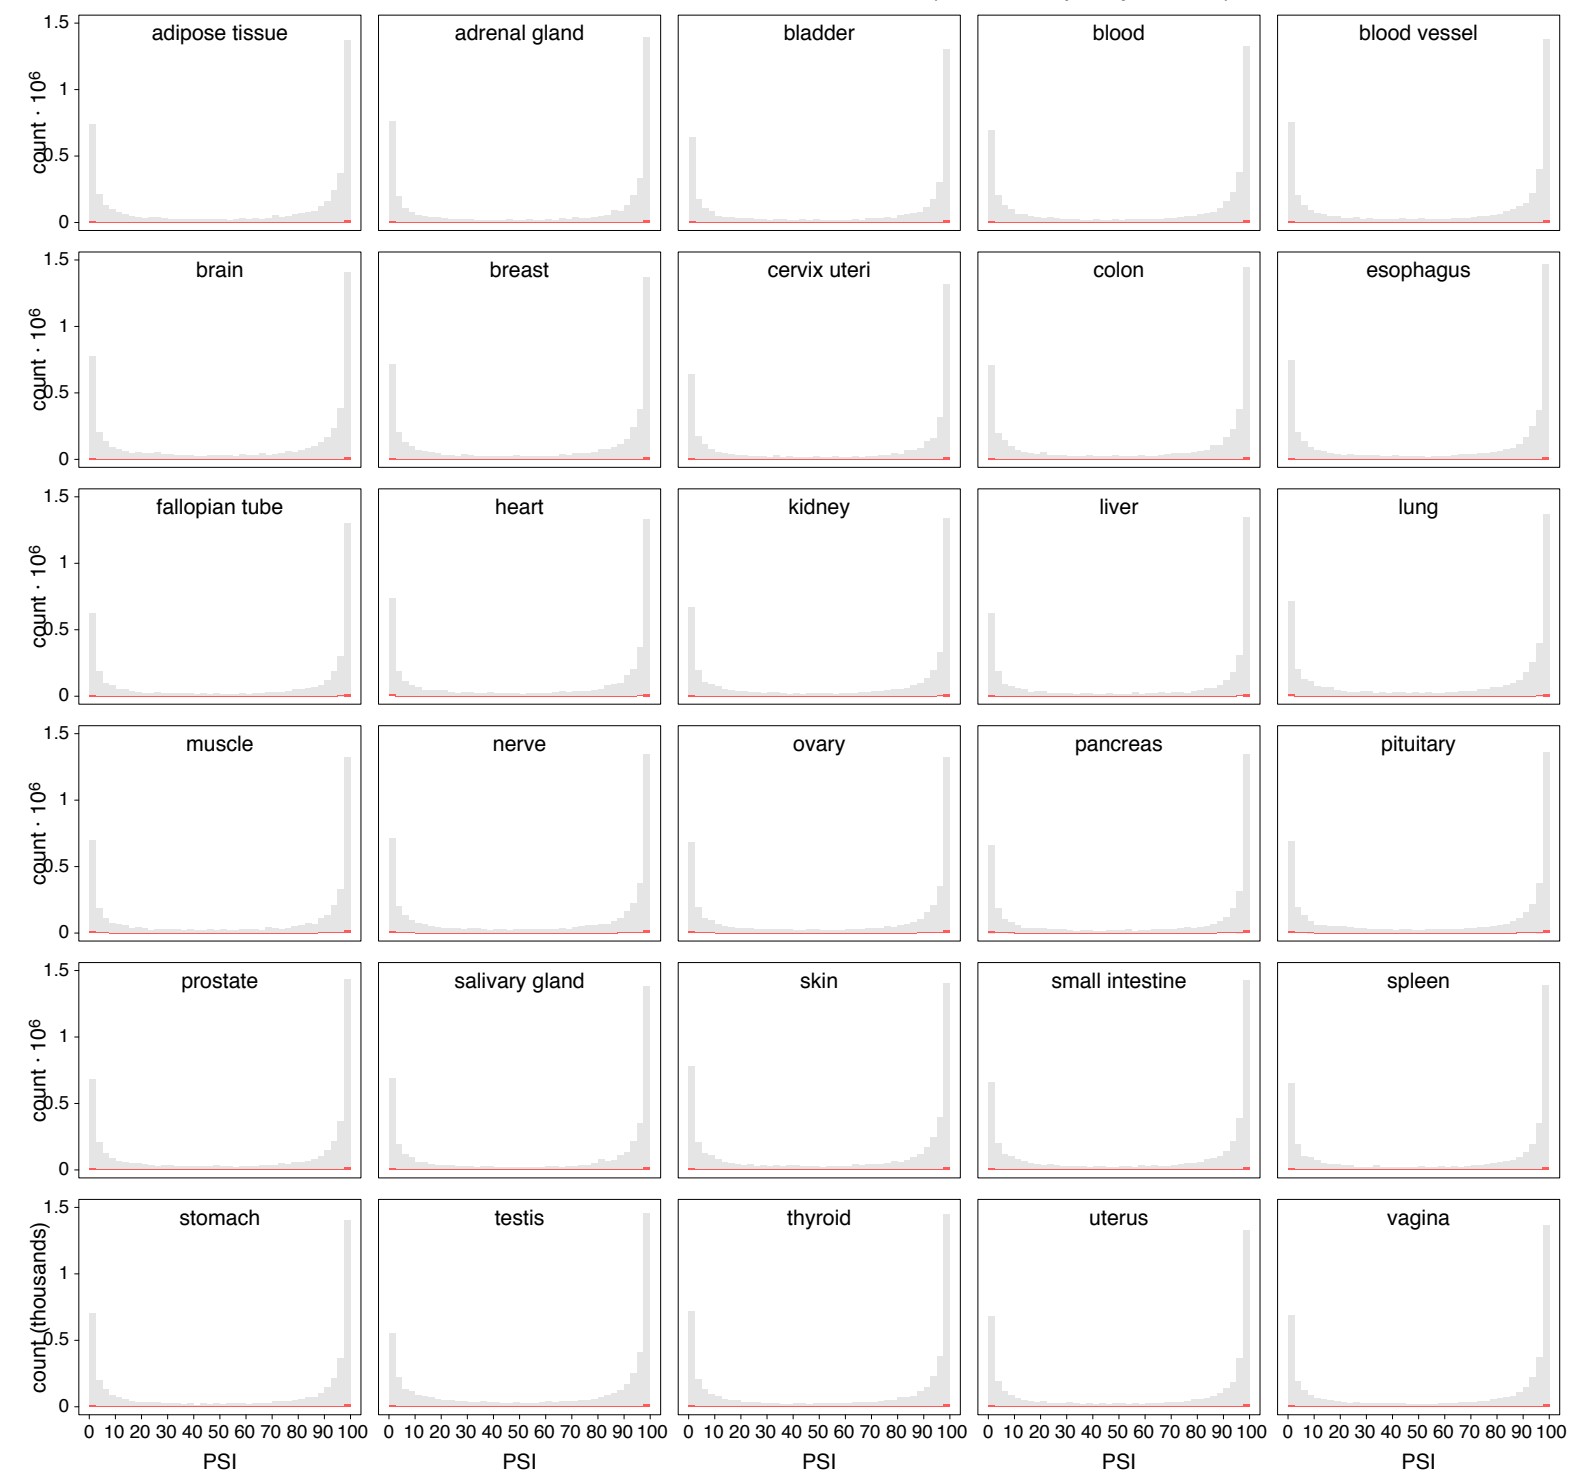

Supplement: supp [file elife-59959-supp-v1.zip]
