# Supplementary material for: Mutations primarily alter the inclusion of alternatively spliced exons
Source: eLife journal article supplement (doi:10.7554/elife.59959), 2020-10-28
Supplement: supp [file elife-59959-supp-v1.zip]

Archive with 27 entries (27 files):
- elife_poa_e59959_Transparent_Reporting_File.docx
- elife_poa_e59959_Figure_1_figure_supplement_1.pdf
- elife_poa_e59959_Figure_2_figure_supplement_1.pdf
- elife_poa_e59959_Figure_3_figure_supplement_1.pdf
- elife_poa_e59959_Figure_3_figure_supplement_2.pdf
- elife_poa_e59959_Figure_4_figure_supplement_1.pdf
- elife_poa_e59959_Figure_4_figure_supplement_2.pdf
- elife_poa_e59959_Figure_4_figure_supplement_3.pdf
- elife_poa_e59959_Figure_4_figure_supplement_4.pdf
- elife_poa_e59959_Figure_5_figure_supplement_1.pdf
- elife_poa_e59959_Figure_5_figure_supplement_2.pdf
- elife_poa_e59959_Figure_5_figure_supplement_3.pdf
- elife_poa_e59959_Figure_5_figure_supplement_4.pdf
- elife_poa_e59959_Figure_7_figure_supplement_1.pdf
- elife_poa_e59959_Figure_7_figure_supplement_2.pdf
- elife_poa_e59959_Figure_7_figure_supplement_3.pdf
- elife_poa_e59959_Figure_7_figure_supplement_4.pdf
- elife_poa_e59959_Figure_7_figure_supplement_5.pdf
- elife_poa_e59959_Figure_7_figure_supplement_6.pdf
- elife_poa_e59959_Figure_7_figure_supplement_7.pdf
- elife_poa_e59959_Figure_7_figure_supplement_8.pdf
- elife_poa_e59959_Figure_7_figure_supplement_9.pdf
- elife_poa_e59959_Figure_7_figure_supplement_10.pdf
- elife_poa_e59959_Figure_7_figure_supplement_11.pdf
- elife_poa_e59959_Figure_7_figure_supplement_12.pdf
- elife_poa_e59959_Figure_7_figure_supplement_13.pdf
- elife_poa_e59959_Figure_7_figure_supplement_14.pdf
