# Supplementary material for: Mutations primarily alter the inclusion of alternatively spliced exons
Source: eLife journal article supplement (doi:10.7554/elife.59959), 2020-10-28

**A** distribution of exon inclusion levels

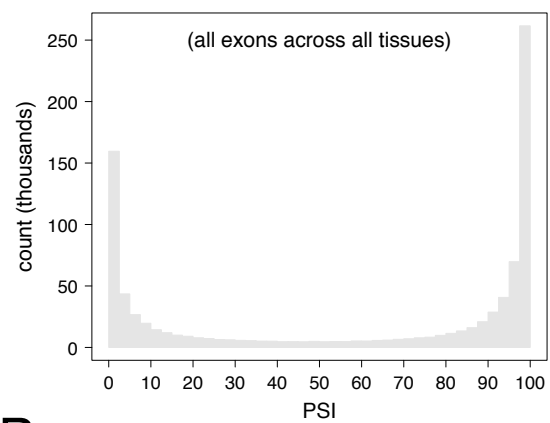

**B** distribution of exon inclusion levels (all exons split by tissues)

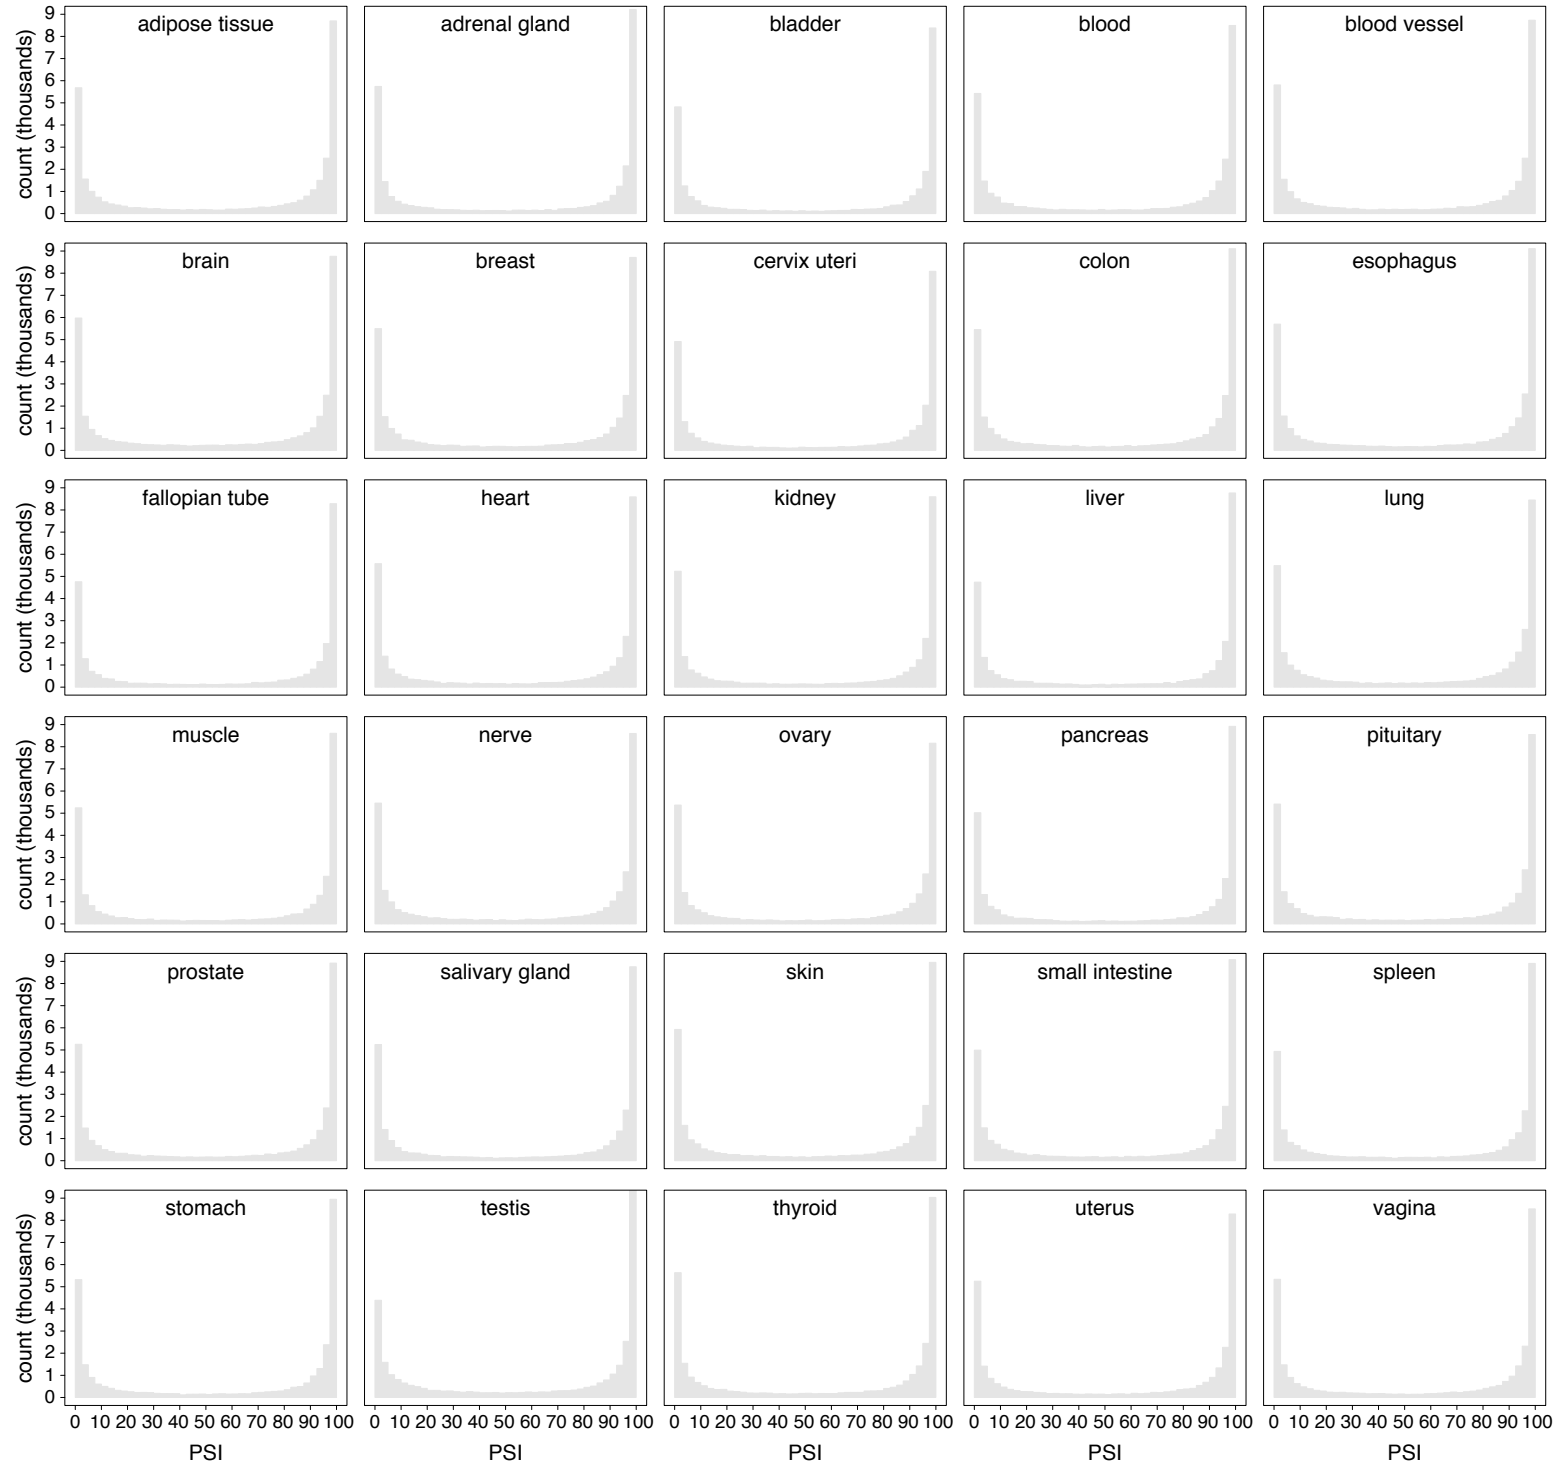

Supplement: supp [file elife-59959-supp-v1.zip › elife_poa_e59959_Figure_4_figure_supplement_2.pdf]
