# Supplementary figures and images for: Mutations primarily alter the inclusion of alternatively spliced exons
Source: eLife journal article supplement (doi:10.7554/elife.59959), 2020-10-28

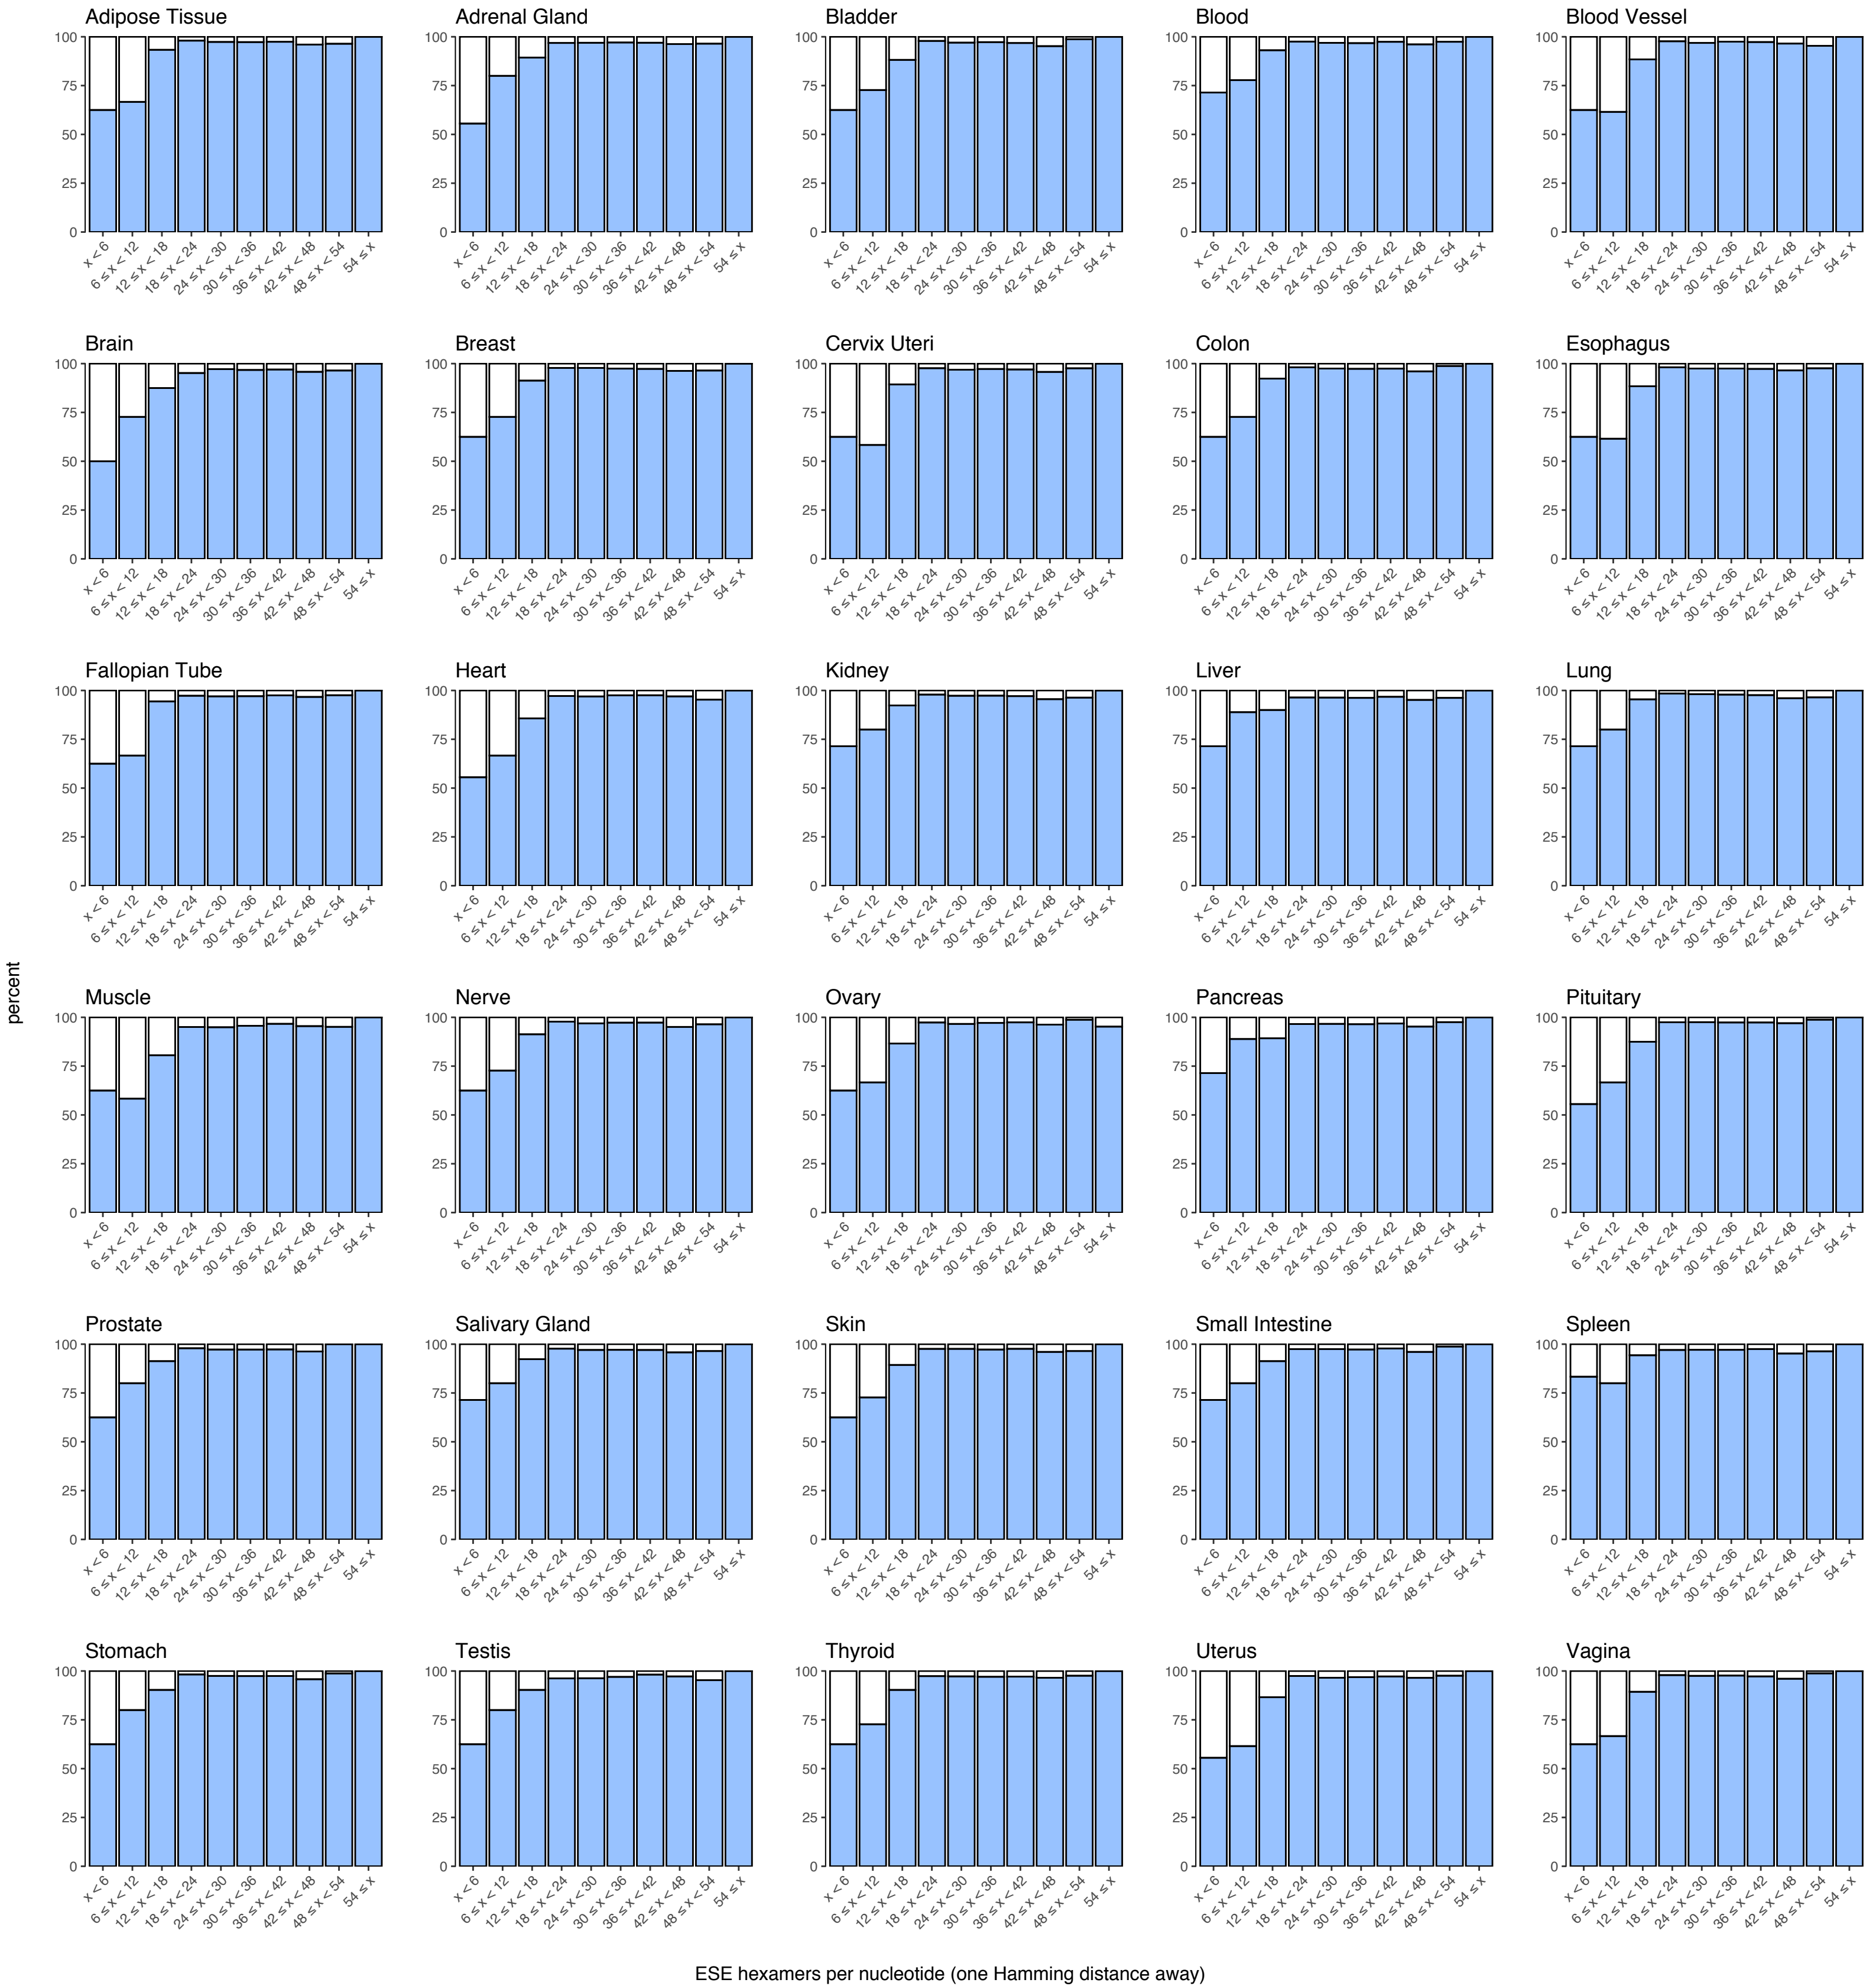

Supplement: supp [file elife-59959-supp-v1.zip]

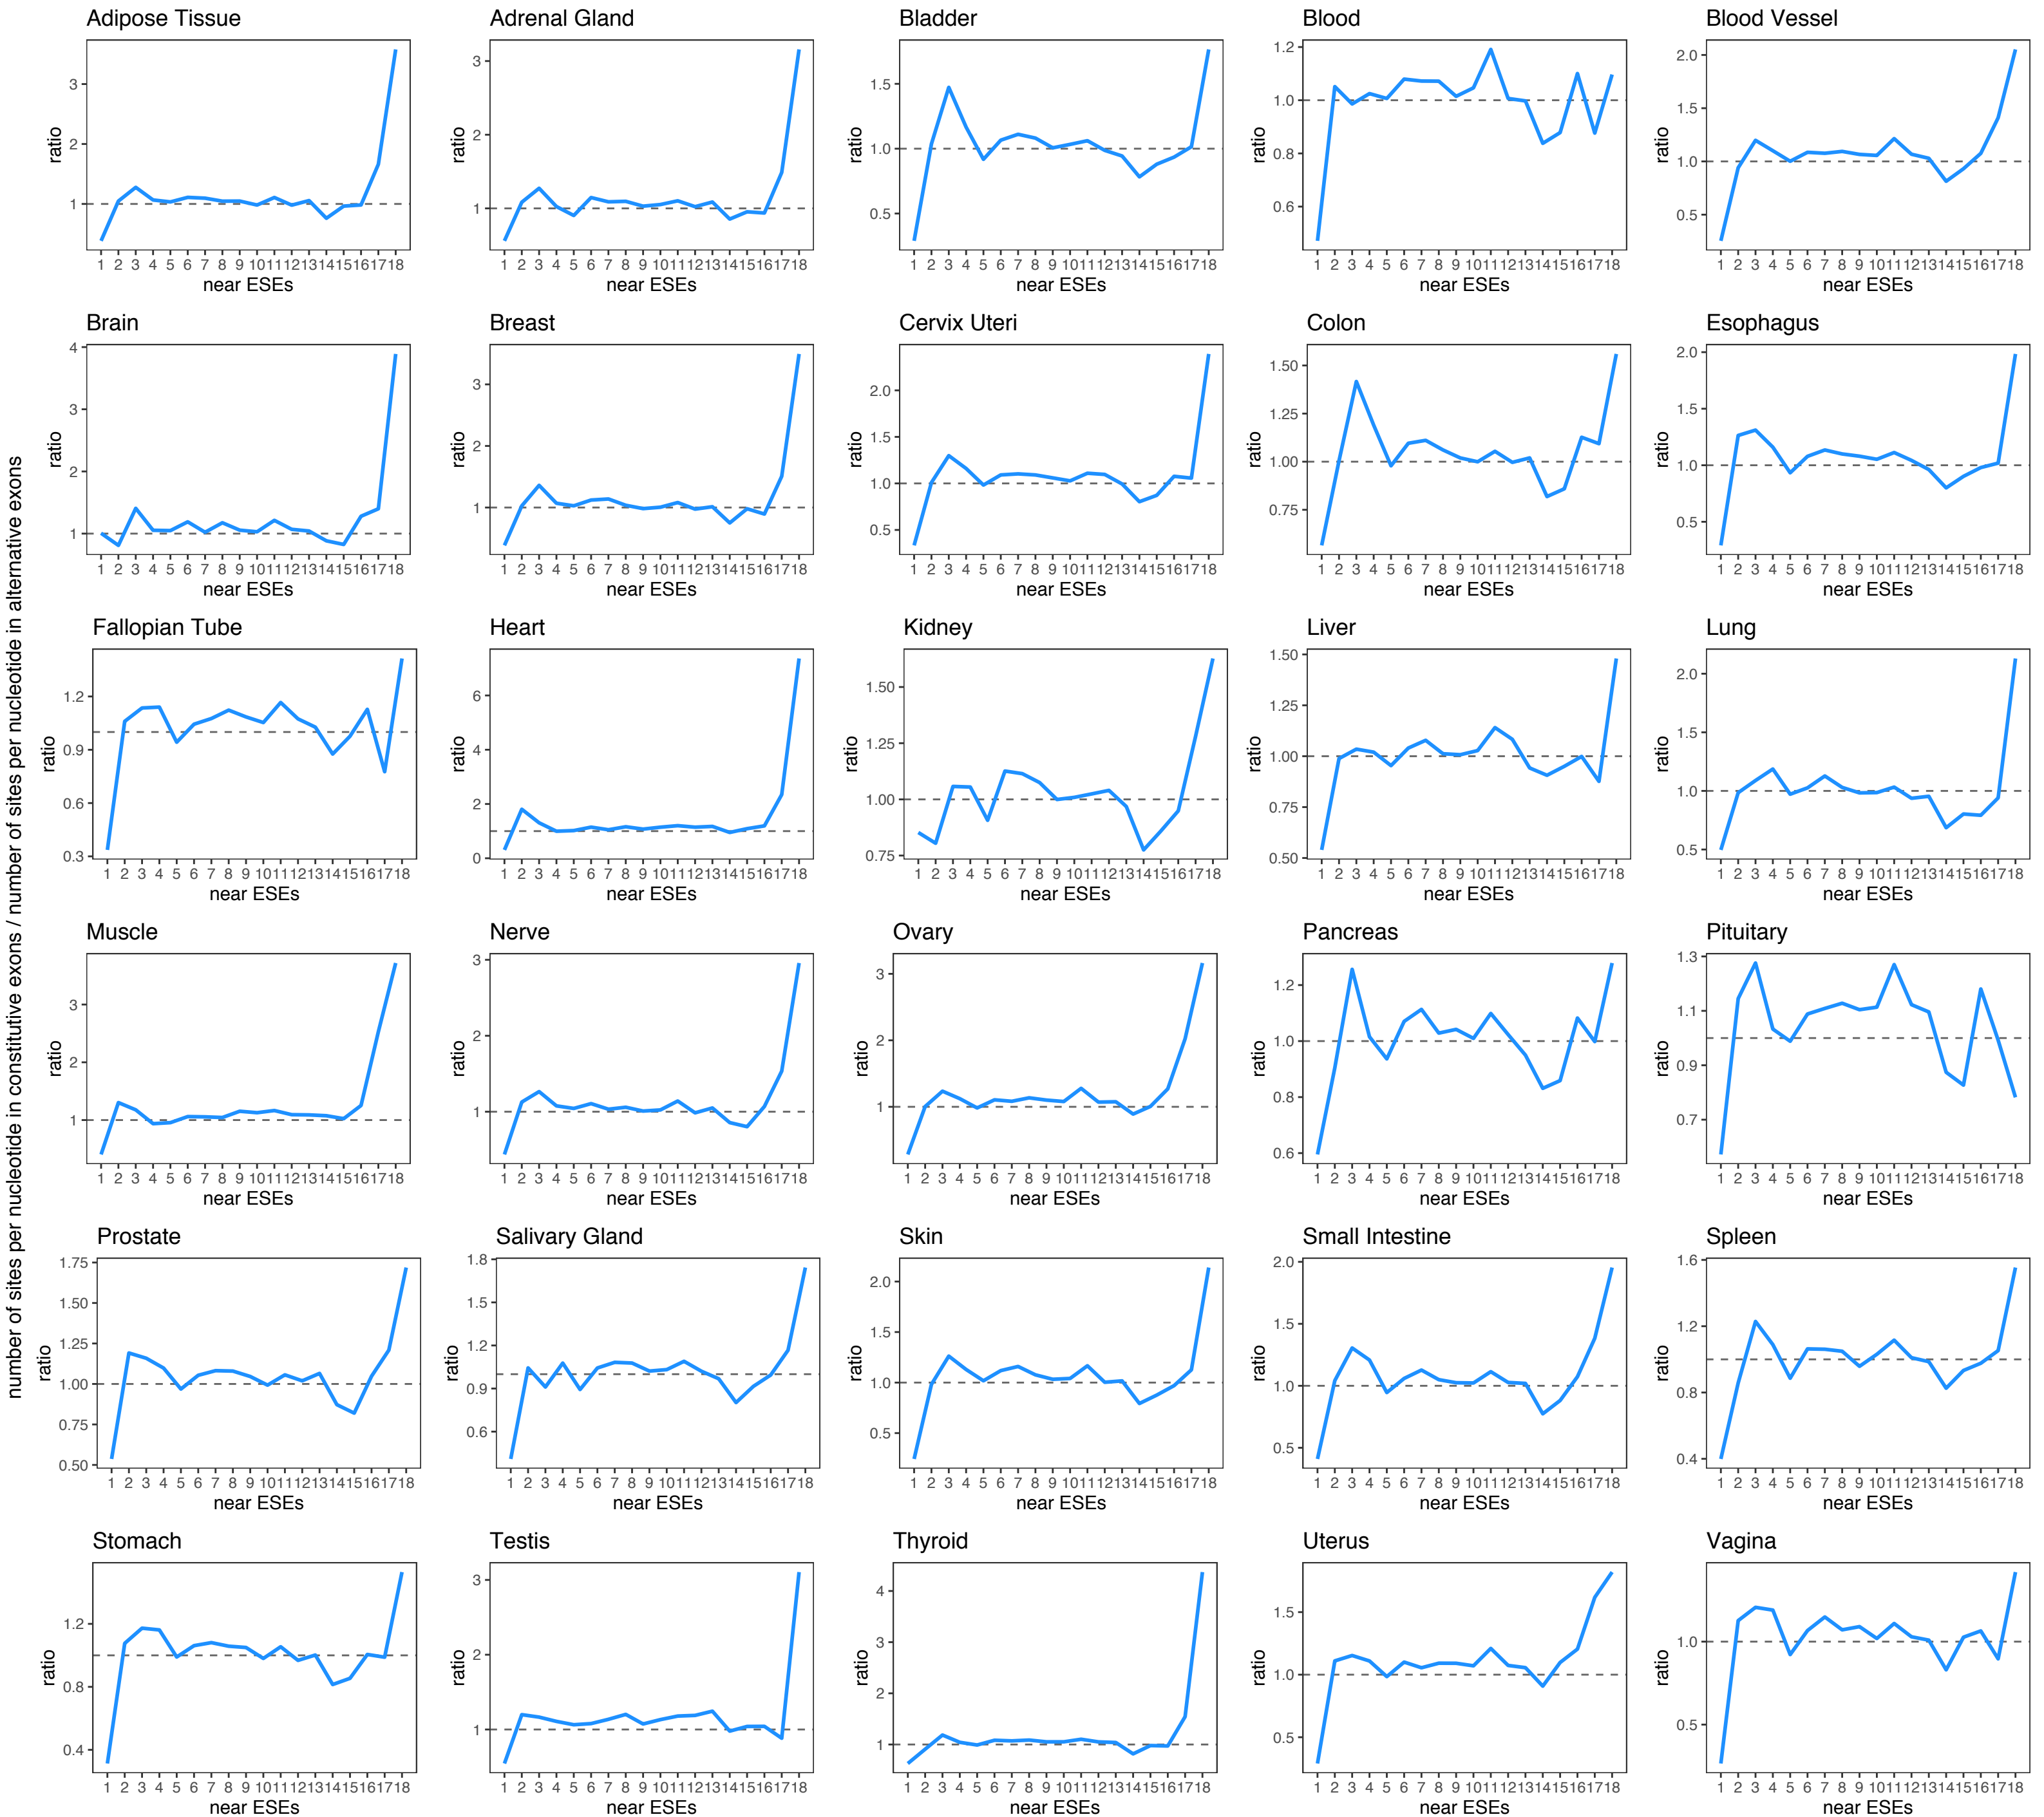

Supplement: supp [file elife-59959-supp-v1.zip]

**A**

DHFR introns &gt; SMN1 introns

n = 27-28

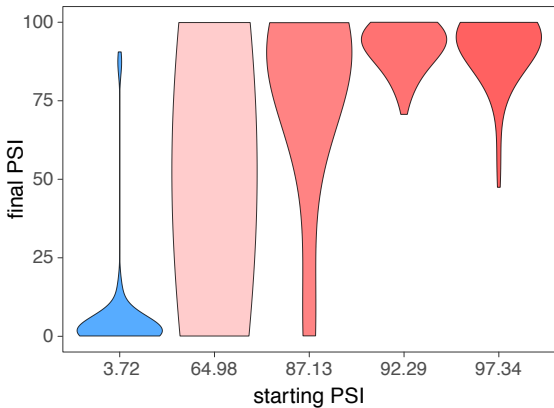**B**

SMN1 introns &gt; DHFR introns

n = 27-28

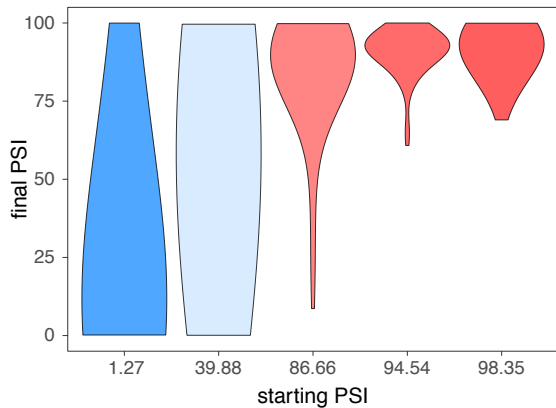

PSI

100

80

60

40

20

0

Supplement: supp [file elife-59959-supp-v1.zip]

**A**

Vex-seq library (K562 cells)

n = 162–163

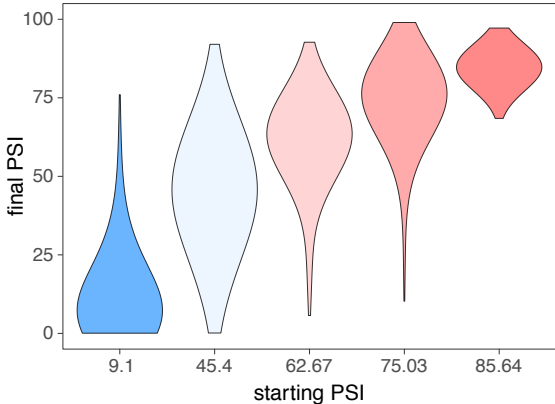**B**

SRE library (SMN1 minigene construct)

n = 27

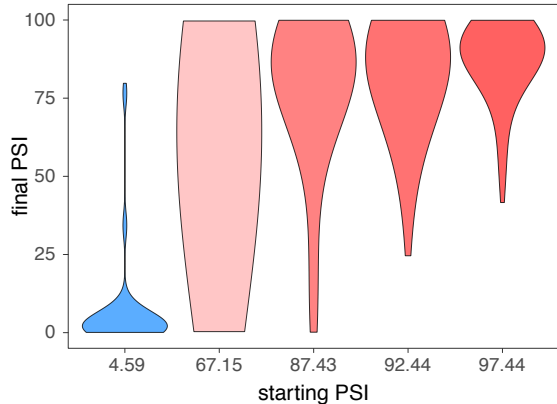

PSI

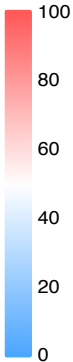

Supplement: supp [file elife-59959-supp-v1.zip]

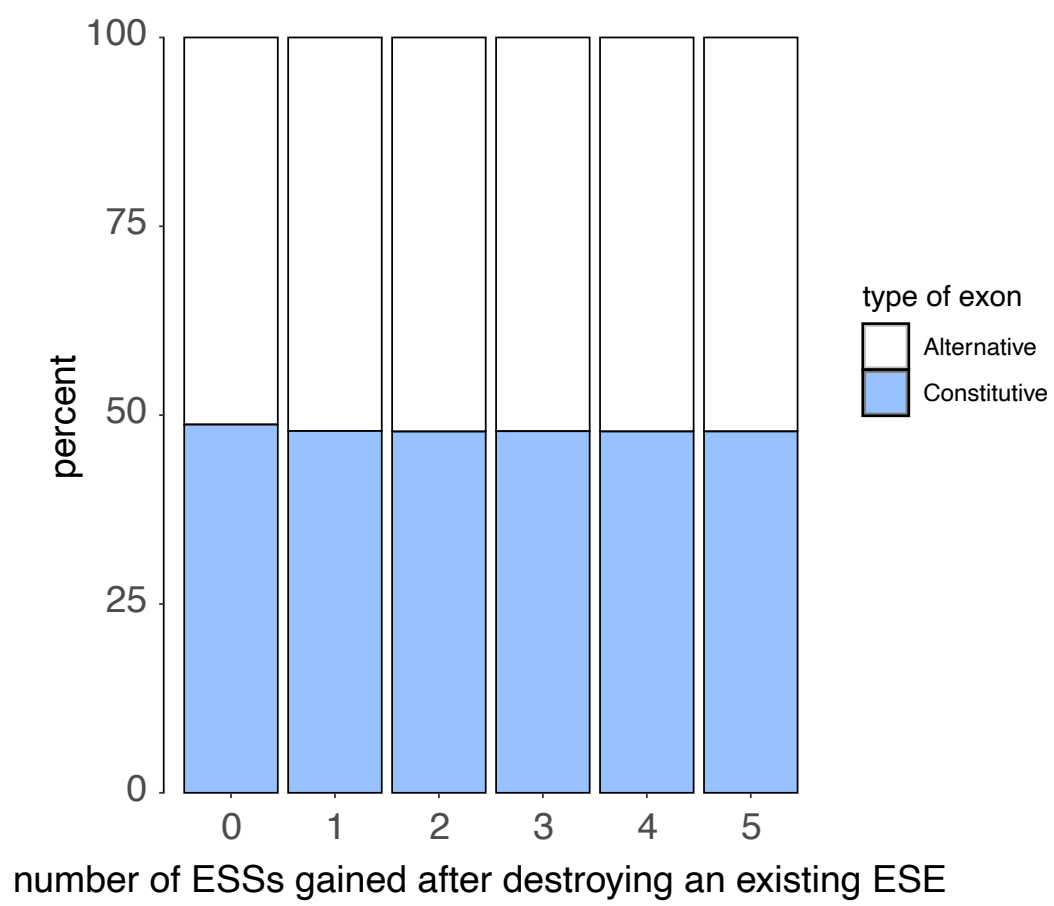

Supplement: supp [file elife-59959-supp-v1.zip]

Delta PSI

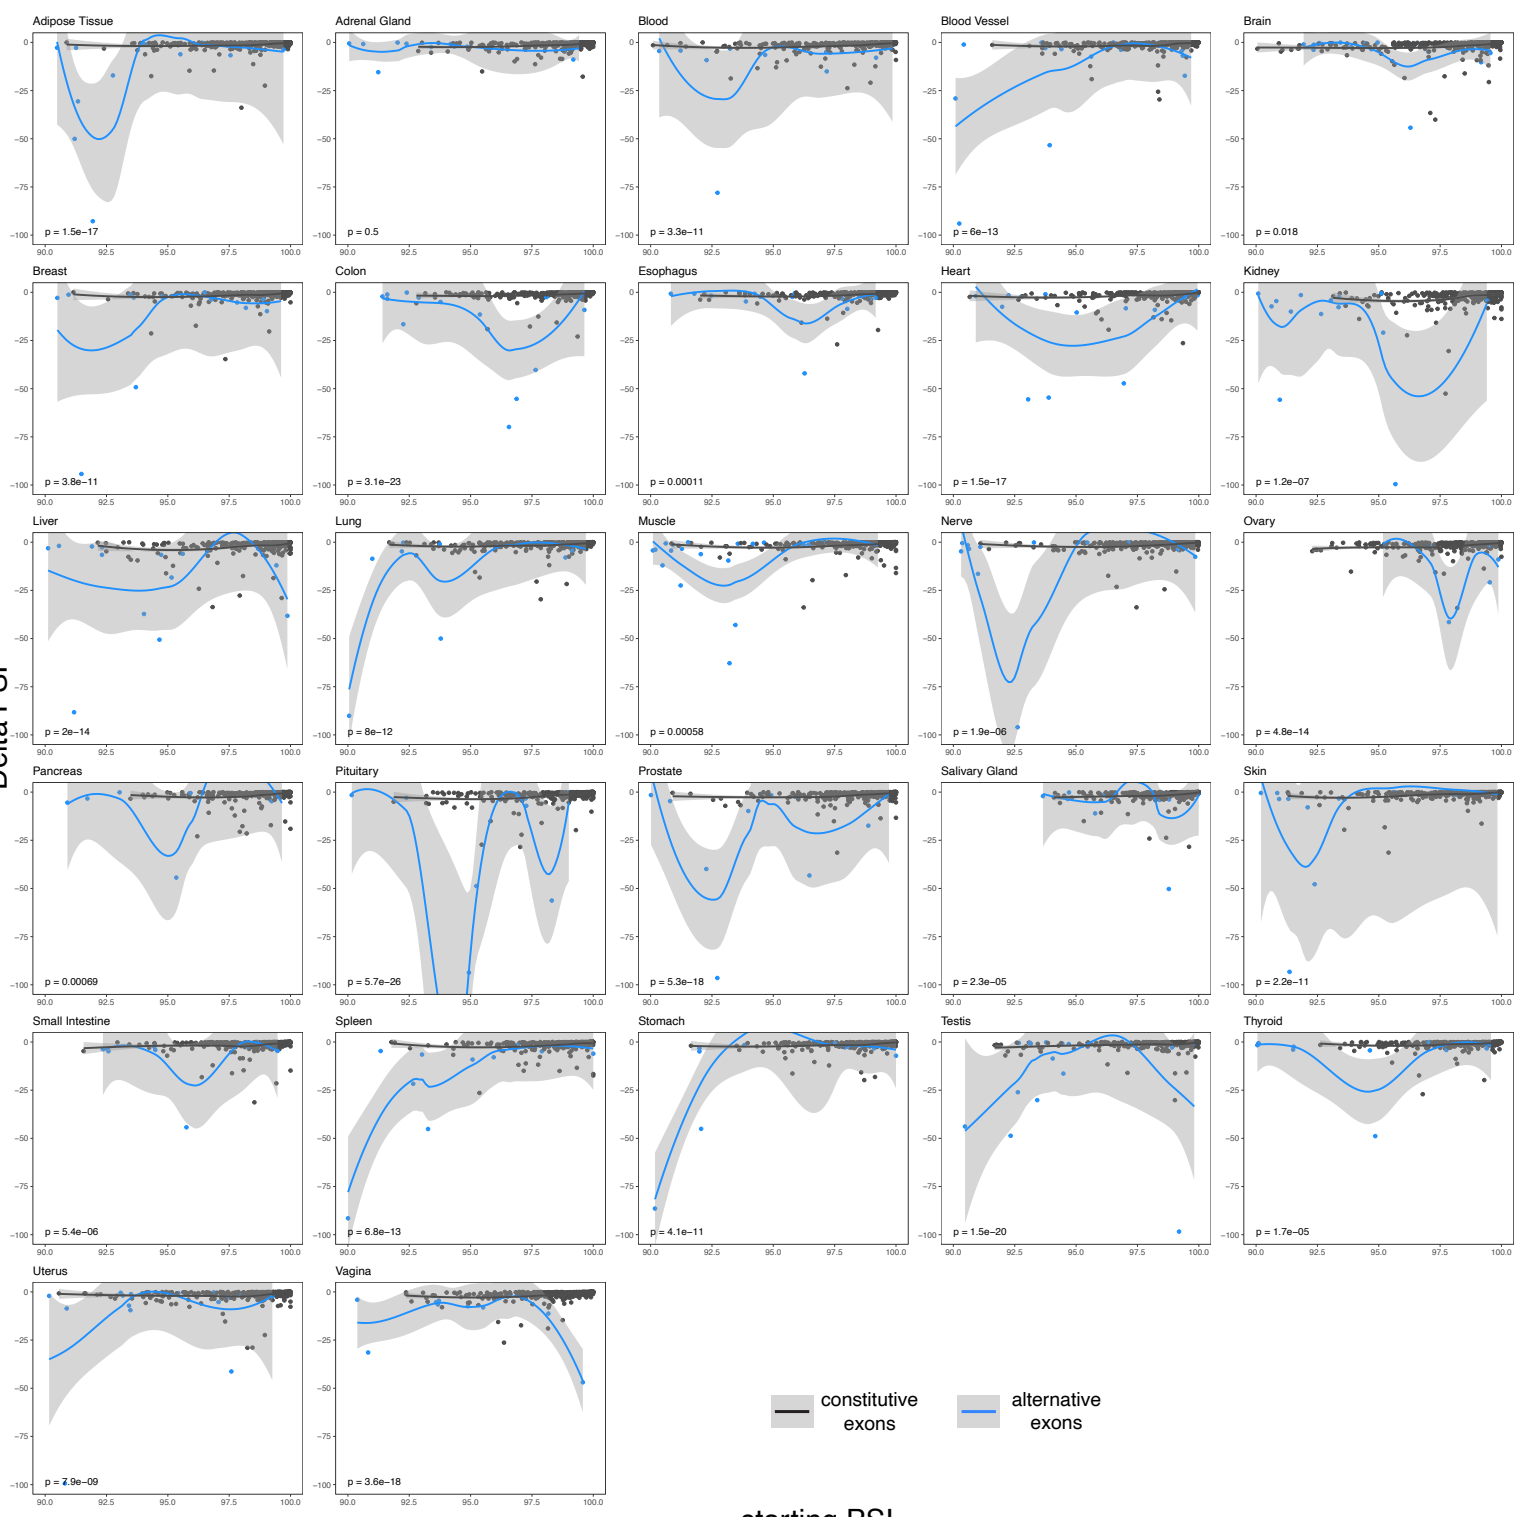

Supplement: supp [file elife-59959-supp-v1.zip]

alternative exons with a PSI > 90% in at least one tissue

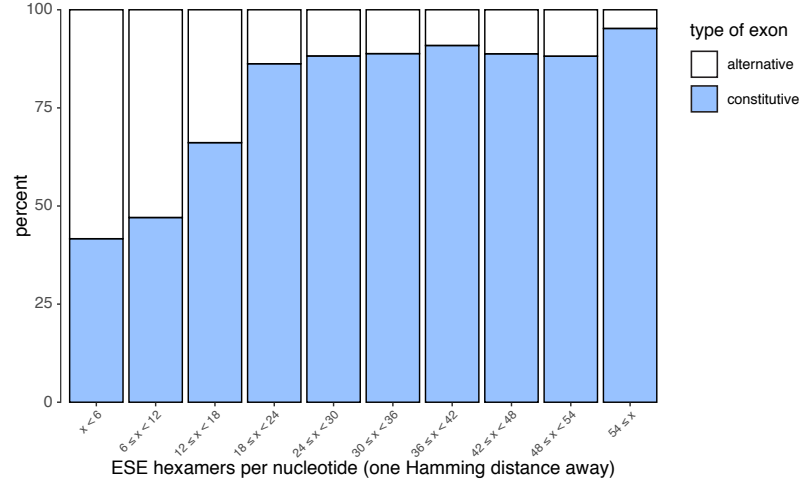

Supplement: supp [file elife-59959-supp-v1.zip]

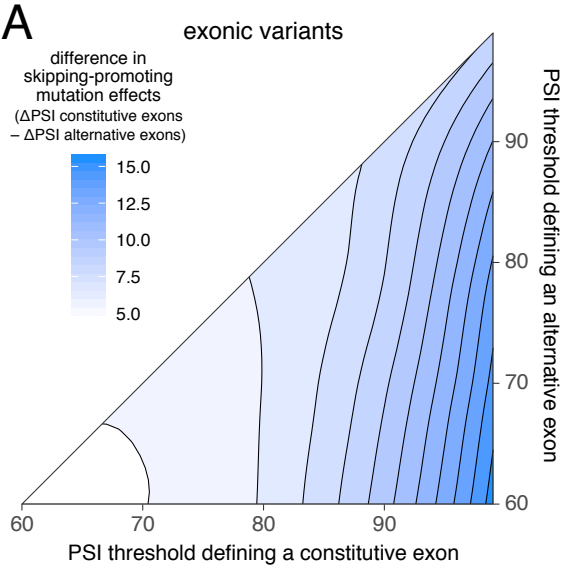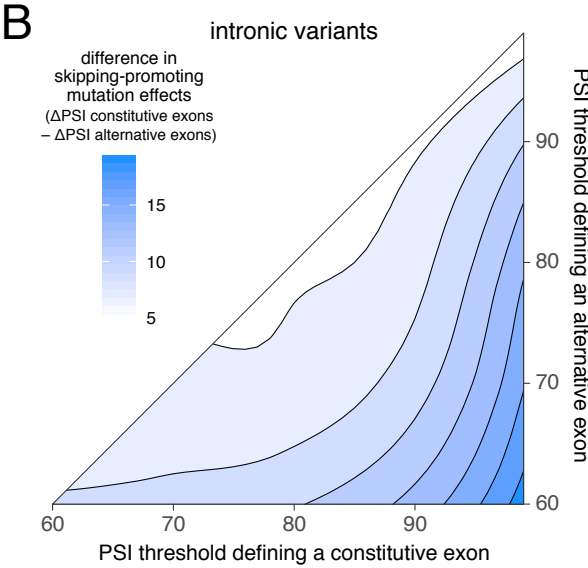

Supplement: supp [file elife-59959-supp-v1.zip]

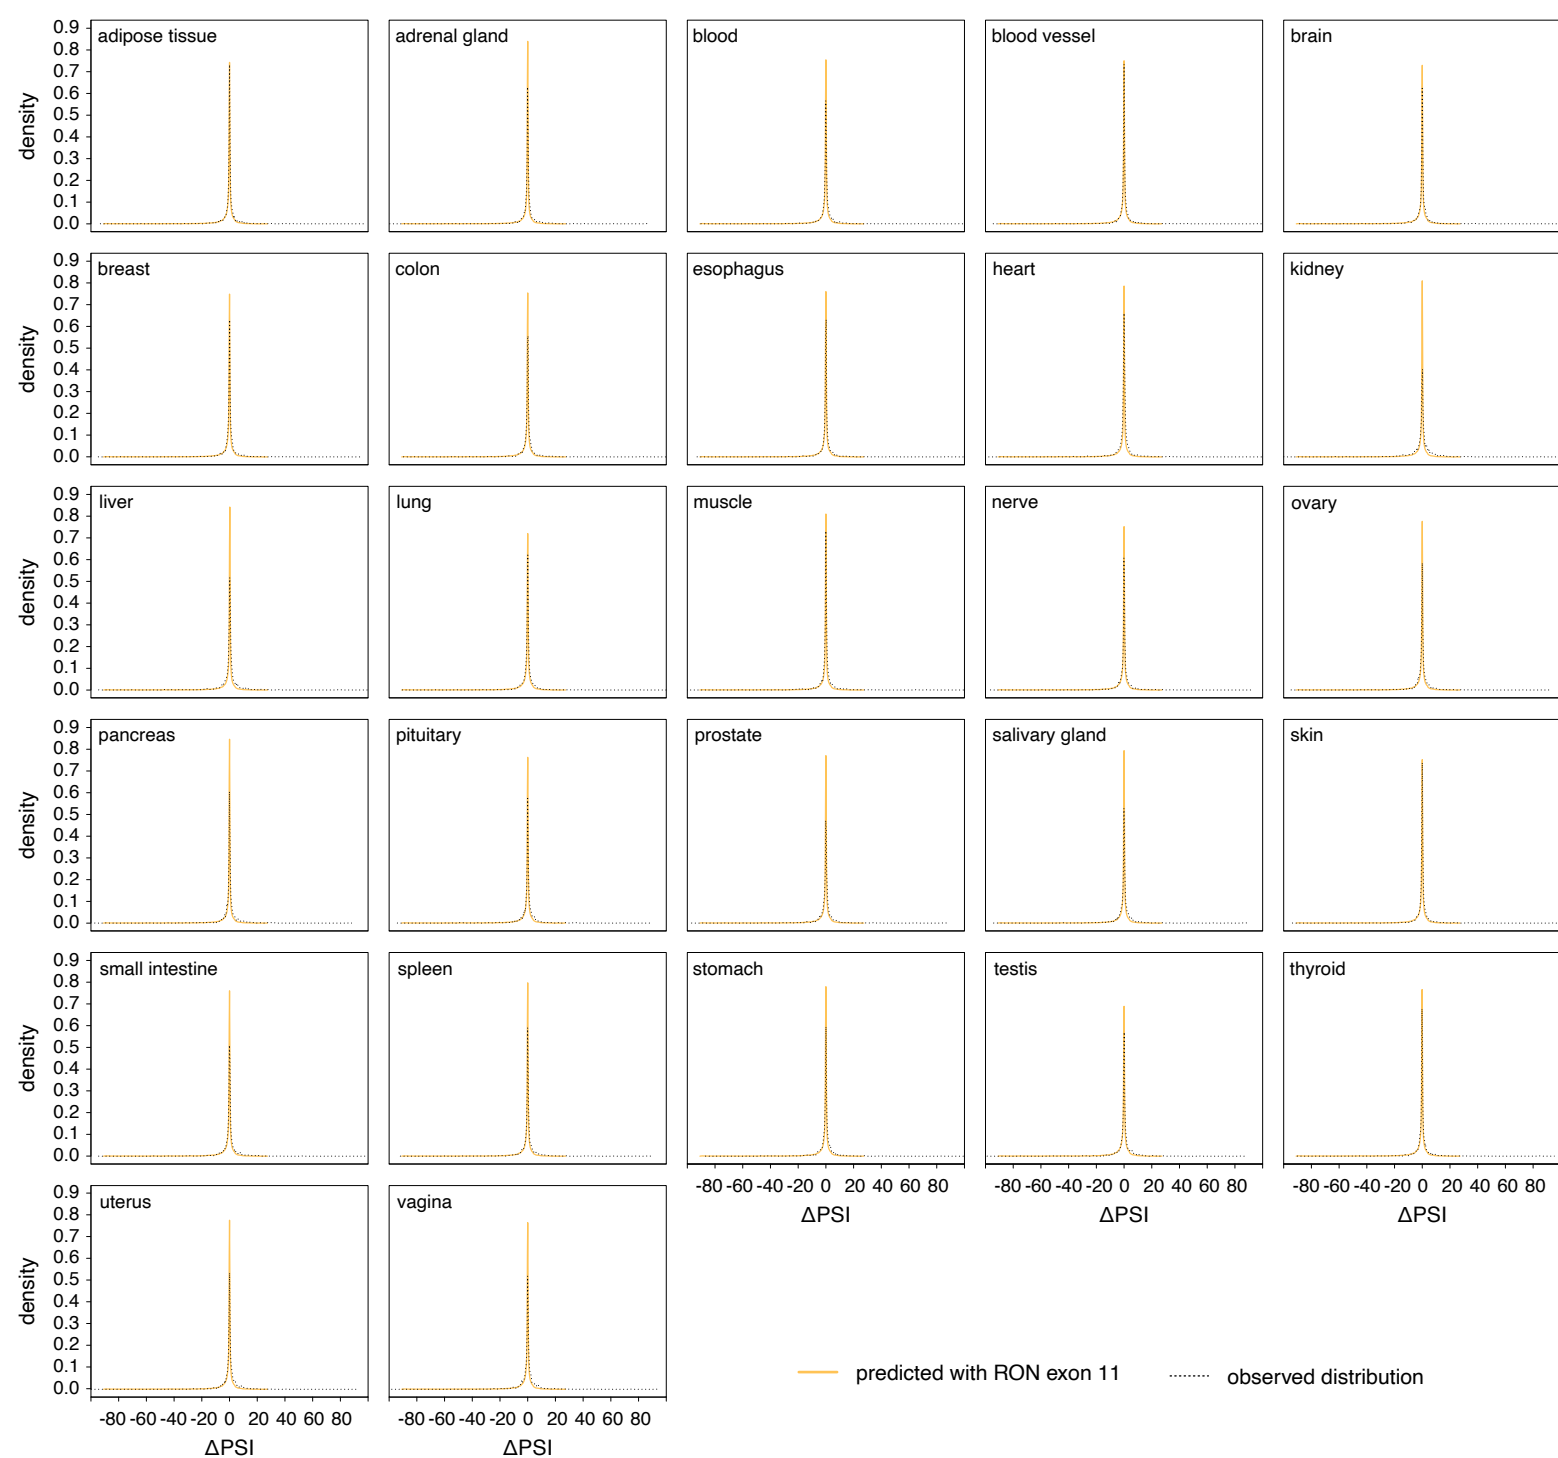

Supplement: supp [file elife-59959-supp-v1.zip]

**A**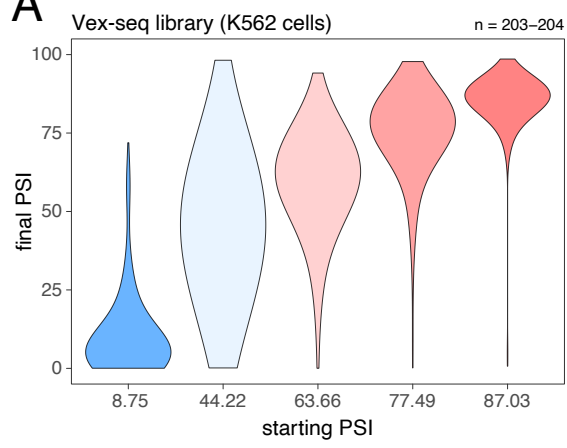**B**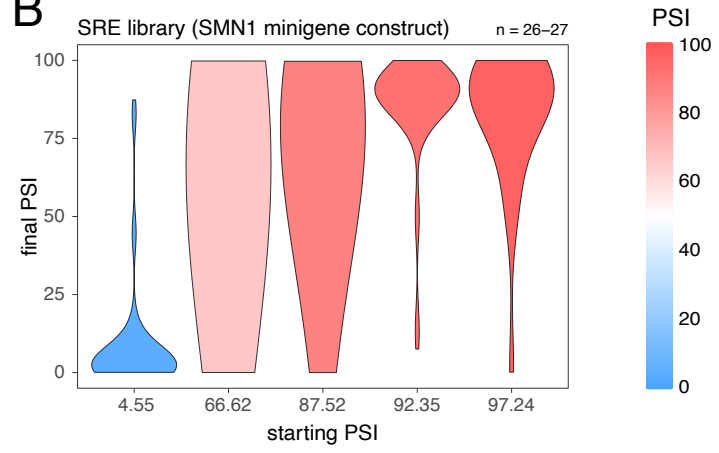

Supplement: supp [file elife-59959-supp-v1.zip]

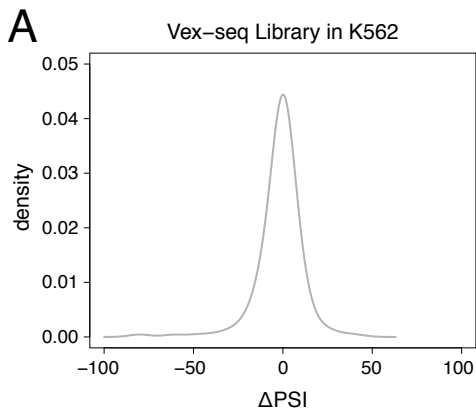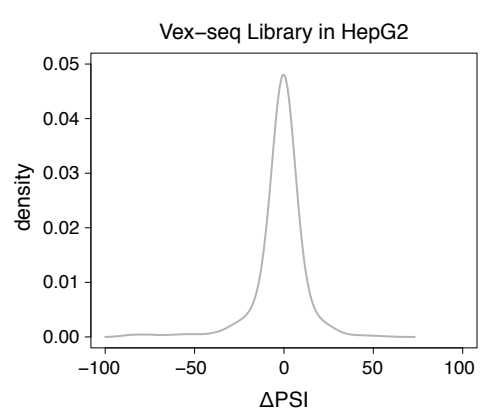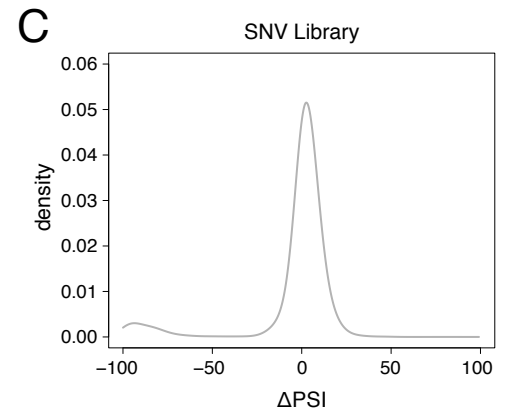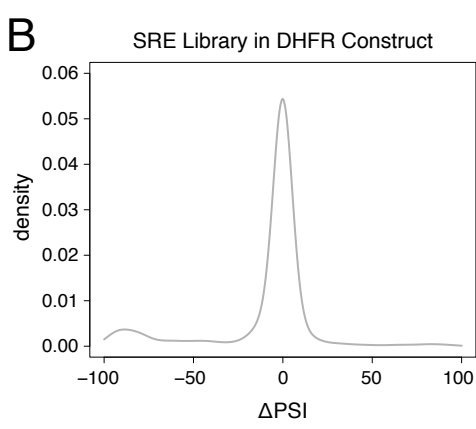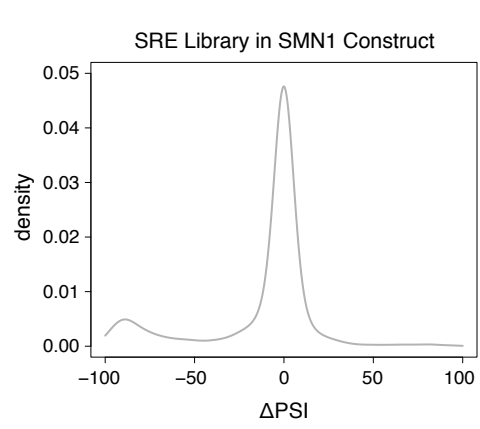

Supplement: supp [file elife-59959-supp-v1.zip]

DPSI distributions at different starting PSI

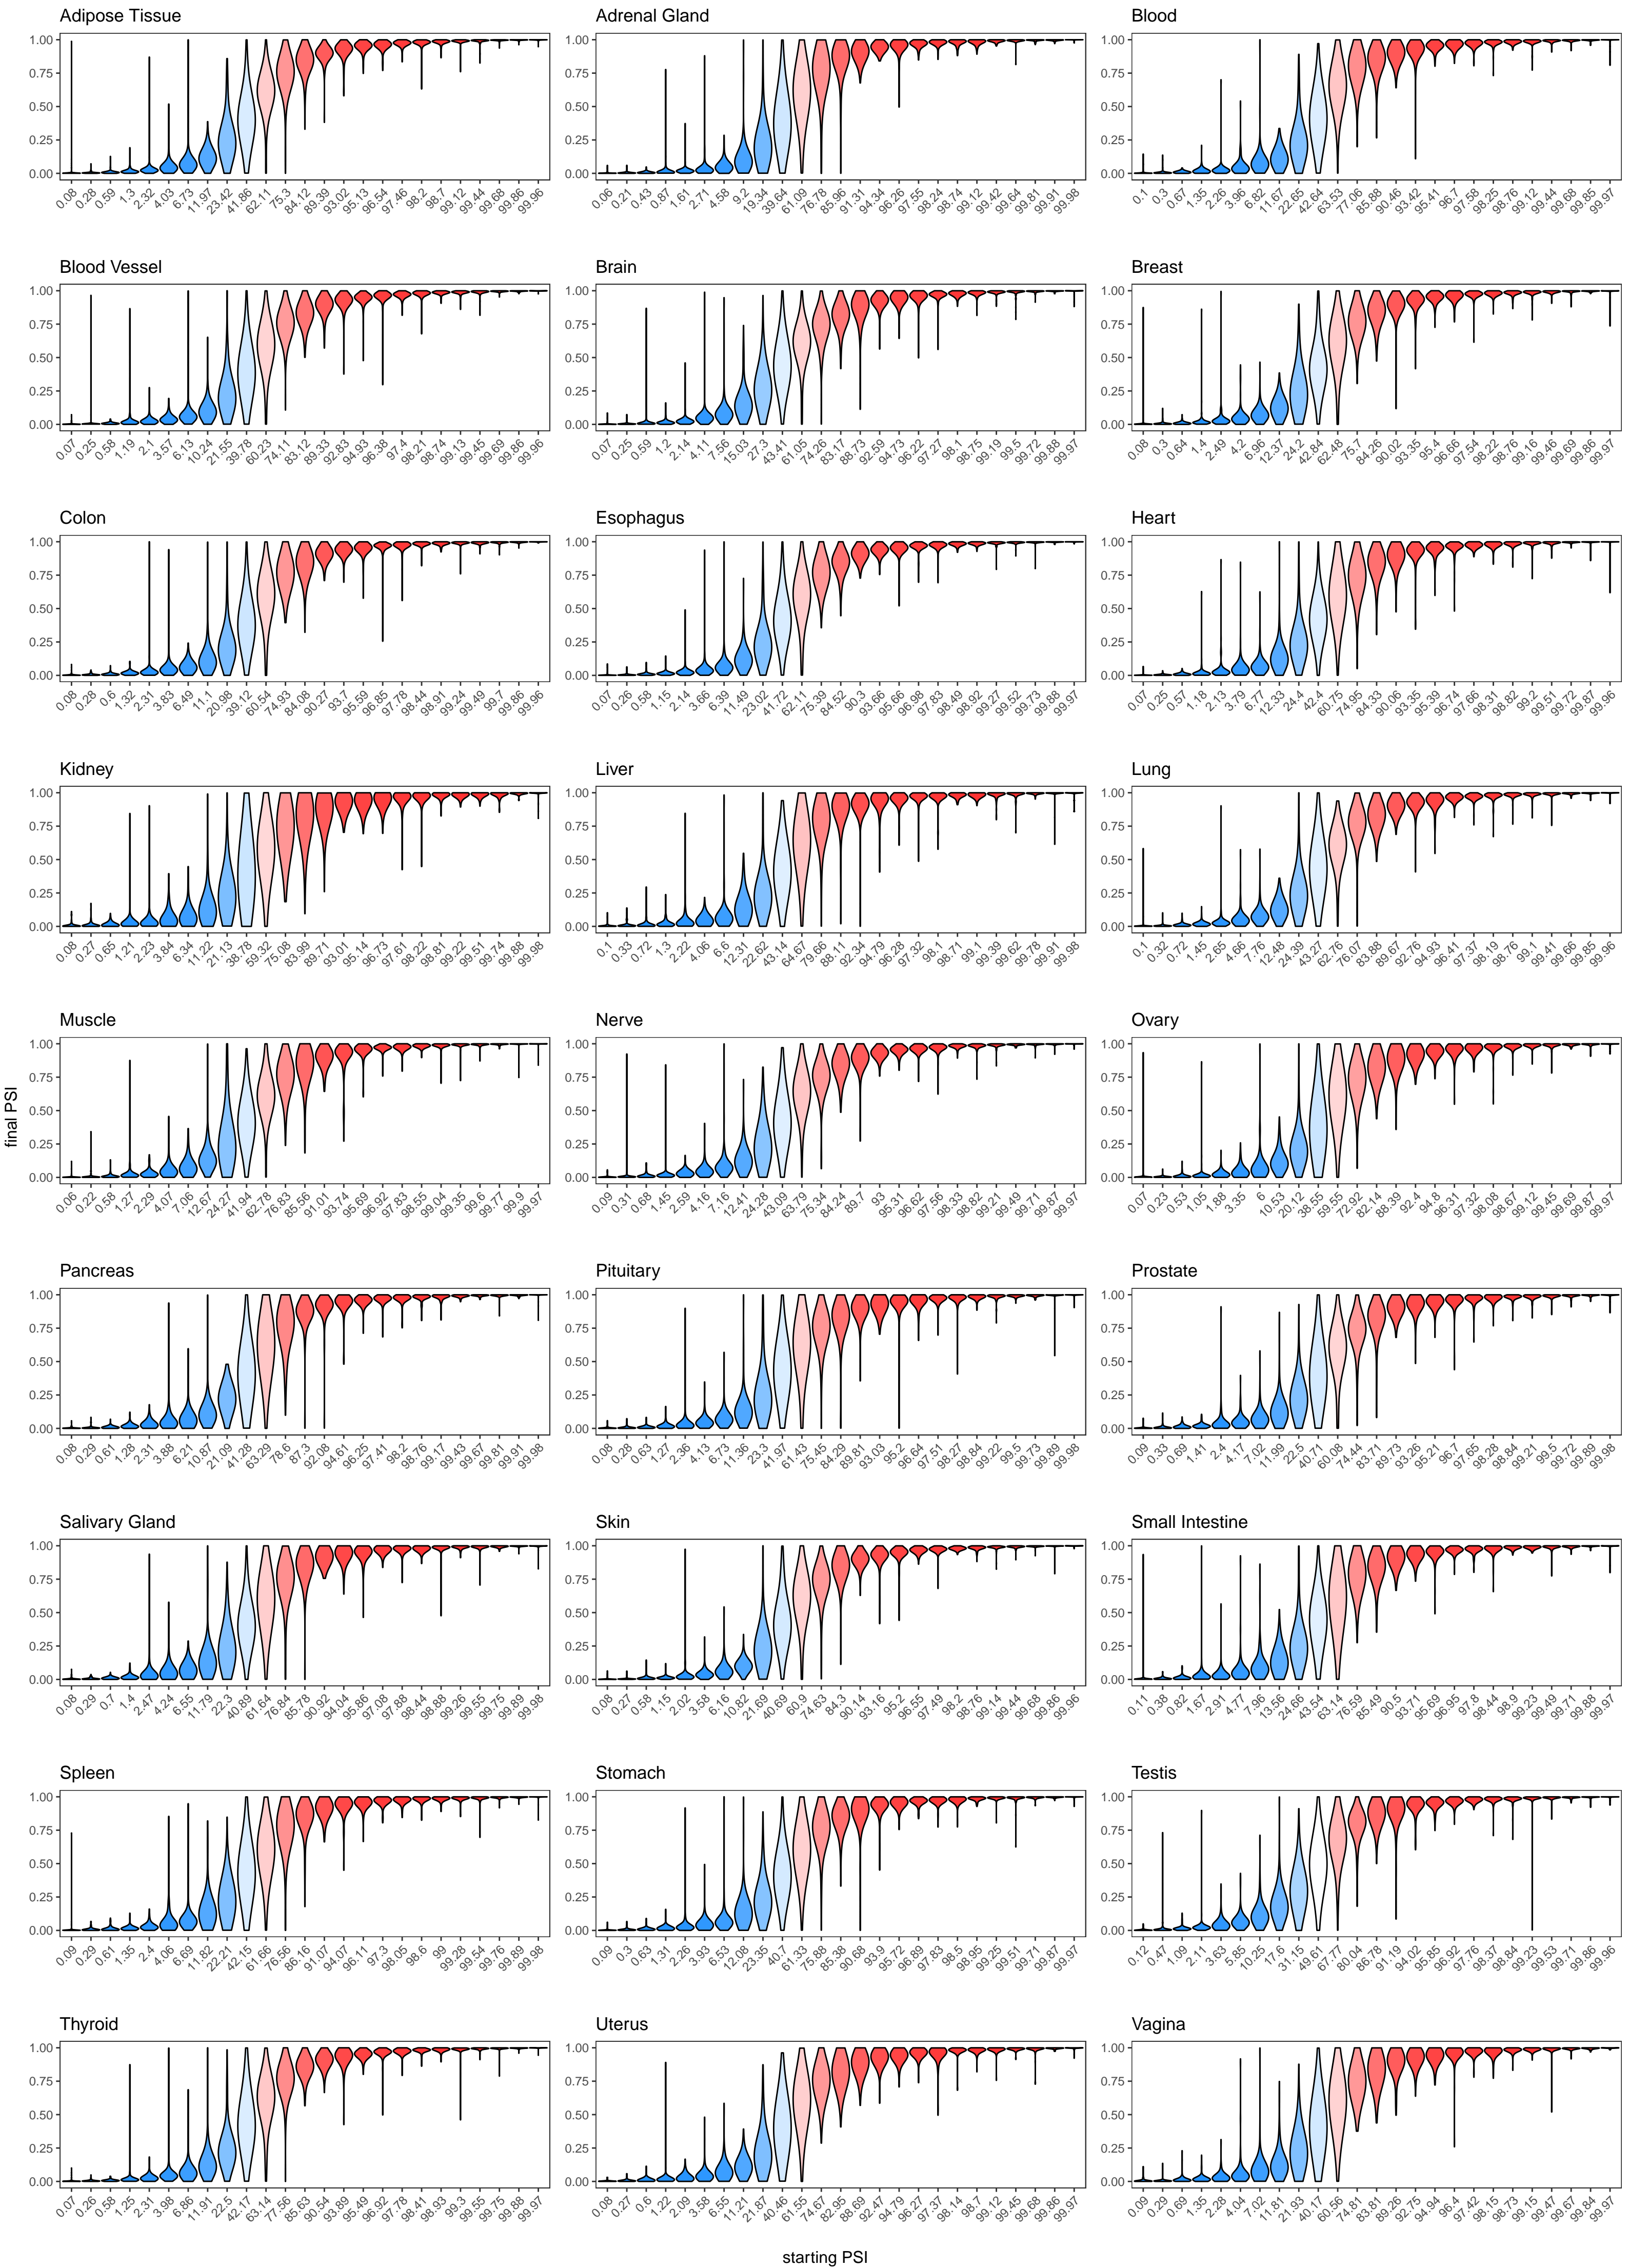

Supplement: supp [file elife-59959-supp-v1.zip]

alternative exons with a PSI > 90% in at least one tissue

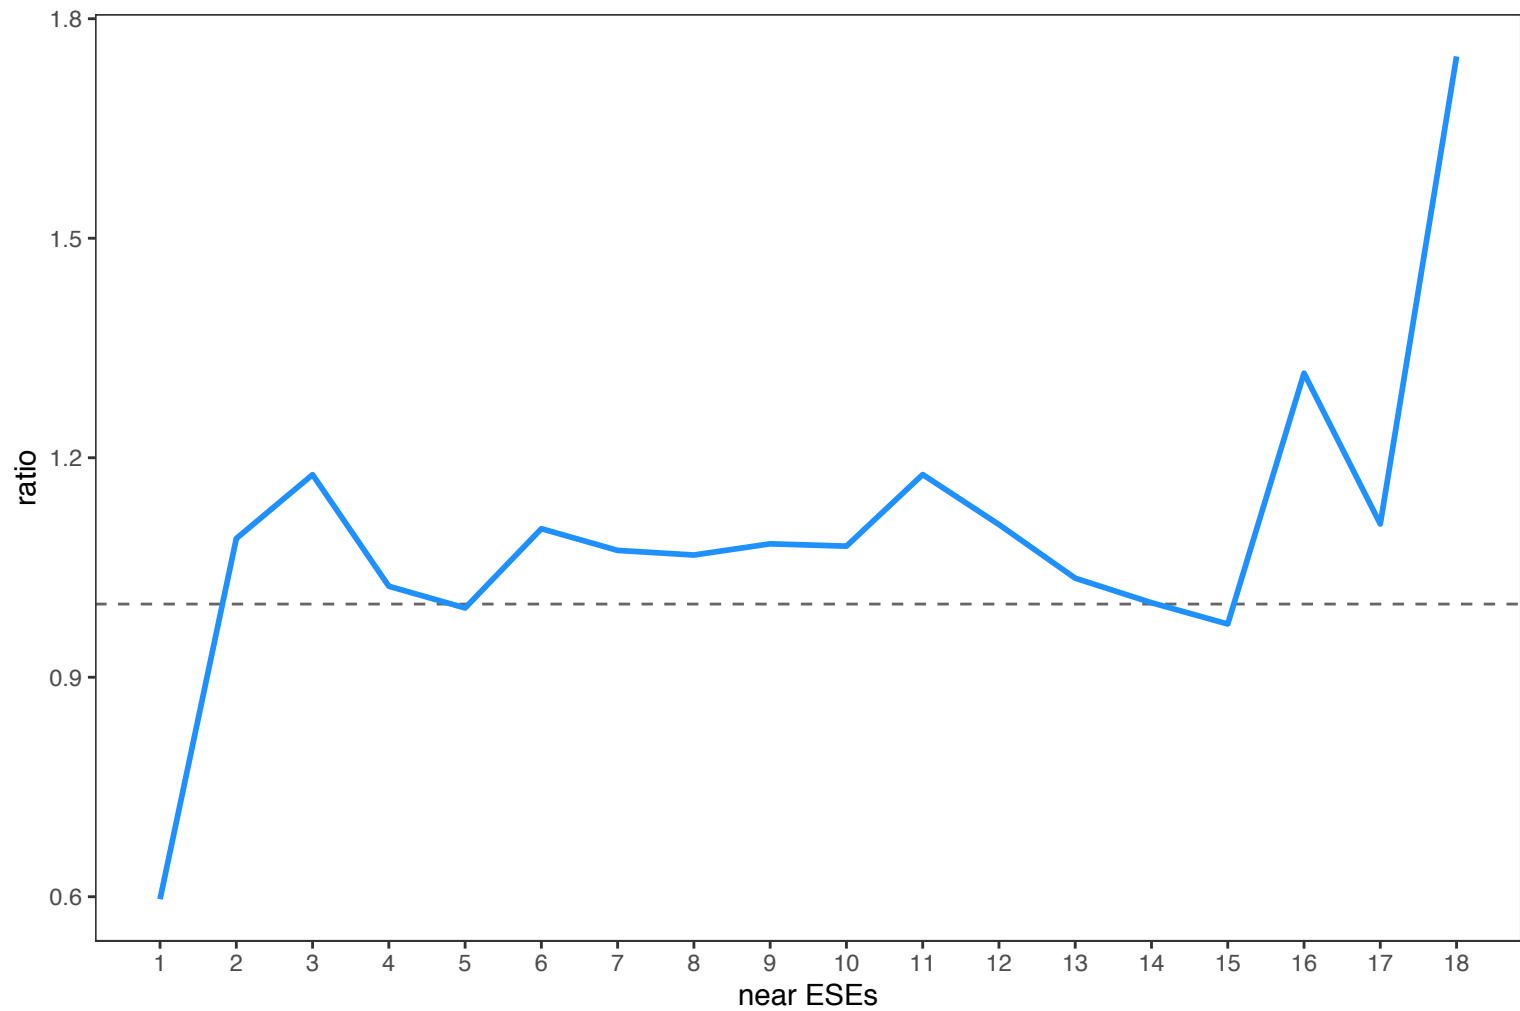

Supplement: supp [file elife-59959-supp-v1.zip]

distribution of mutation effects ( $\Delta$ PSI) split by tissue

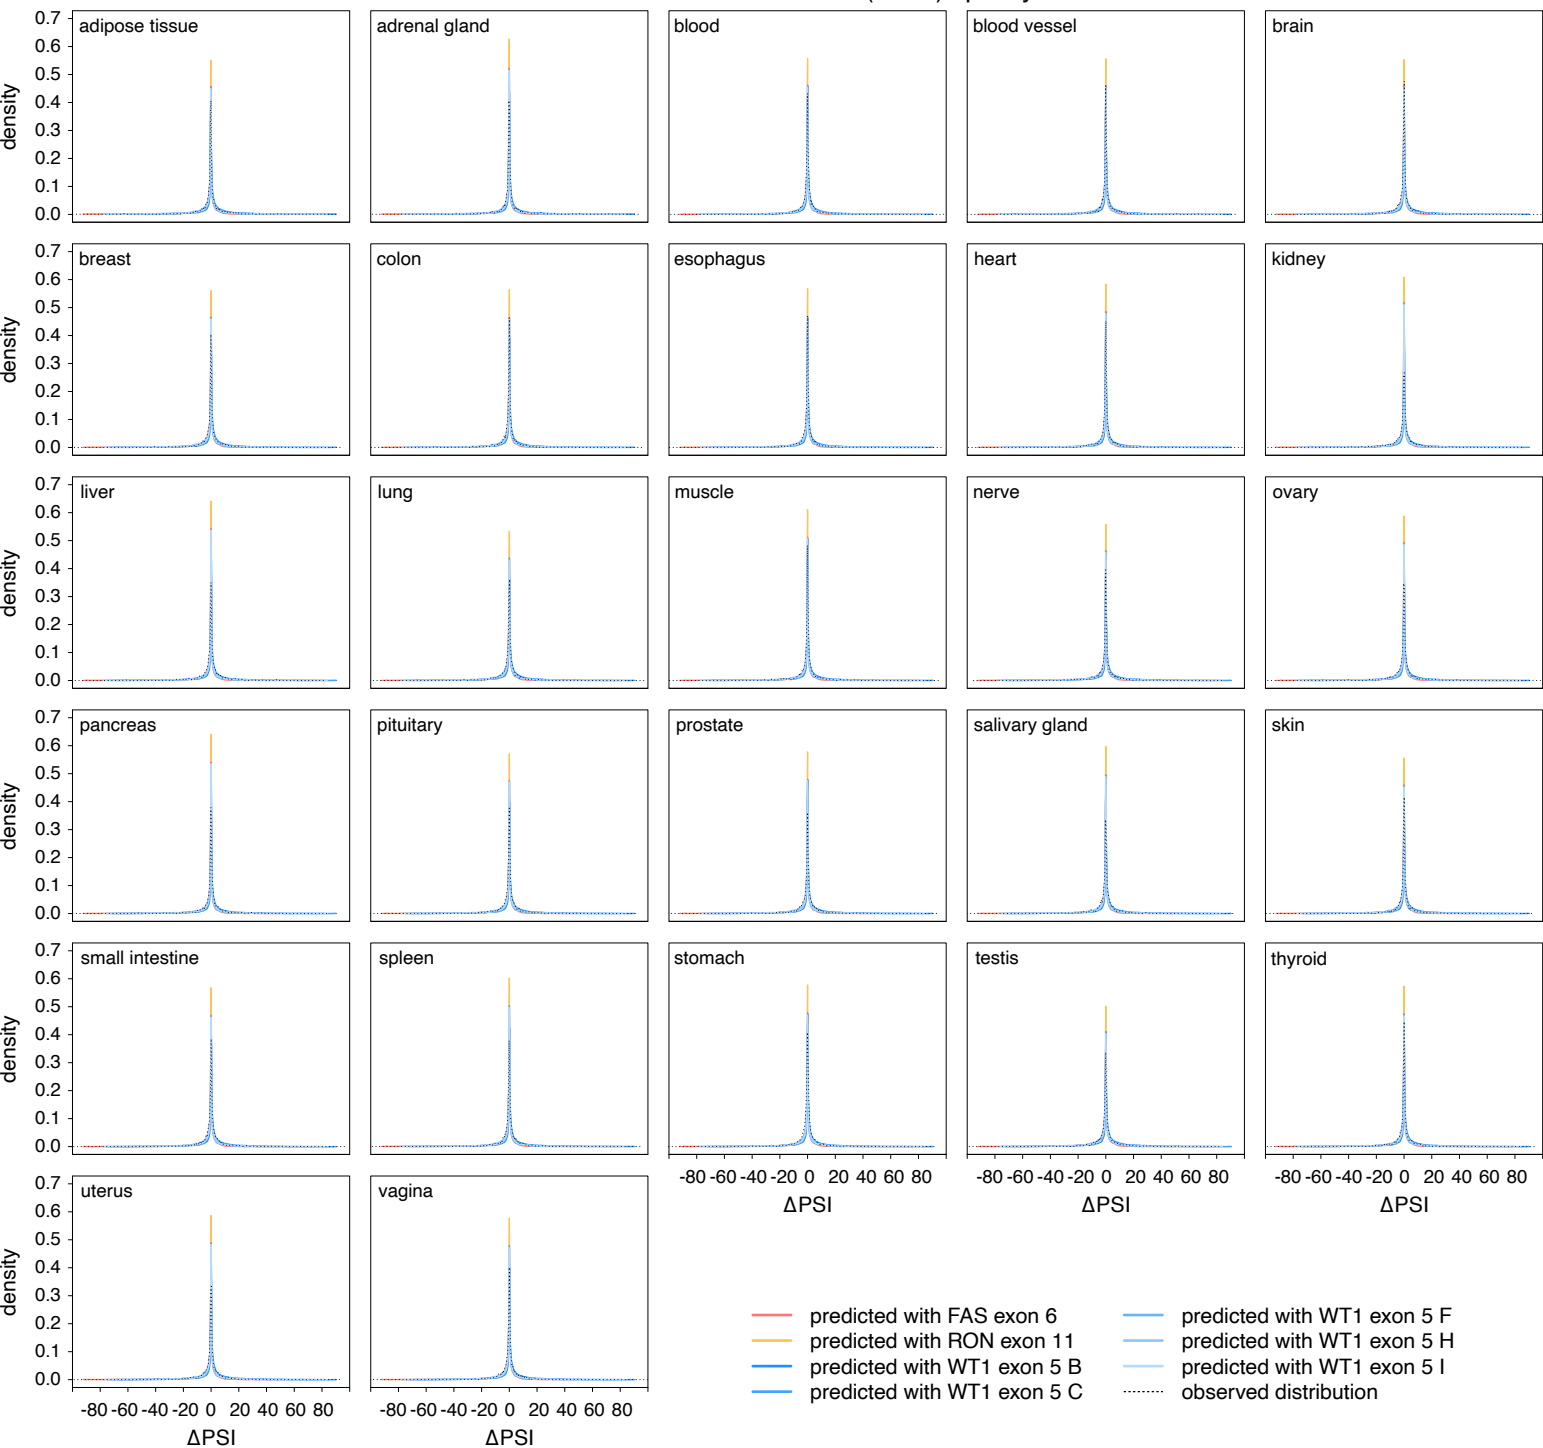

Supplement: supp [file elife-59959-supp-v1.zip]

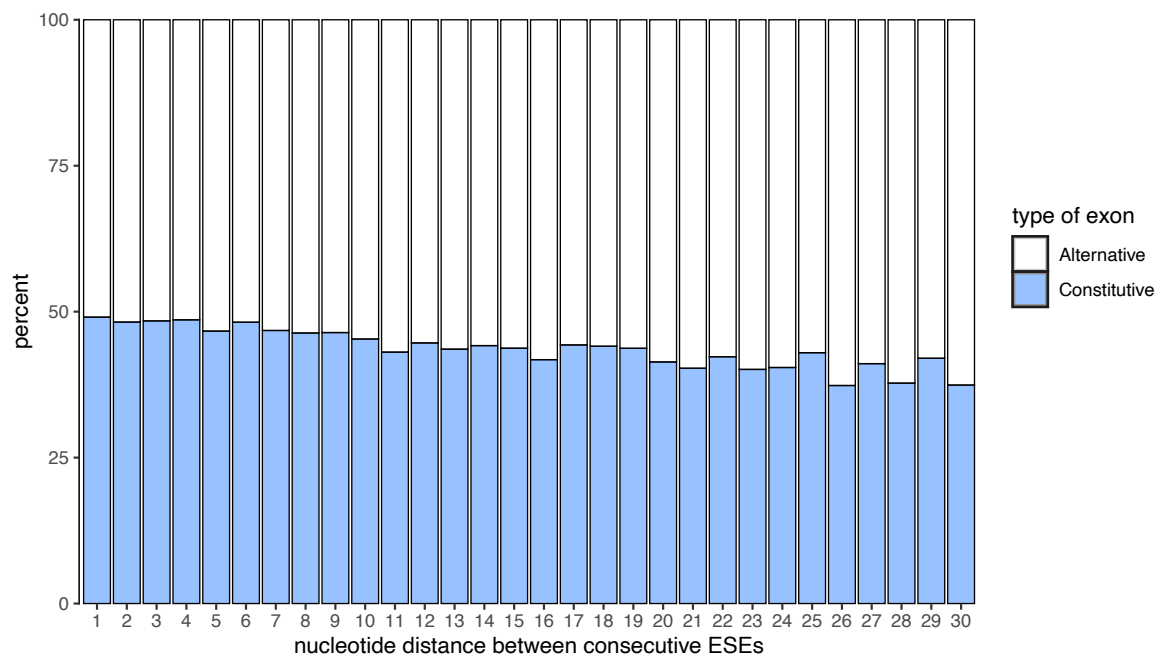

Supplement: supp [file elife-59959-supp-v1.zip]

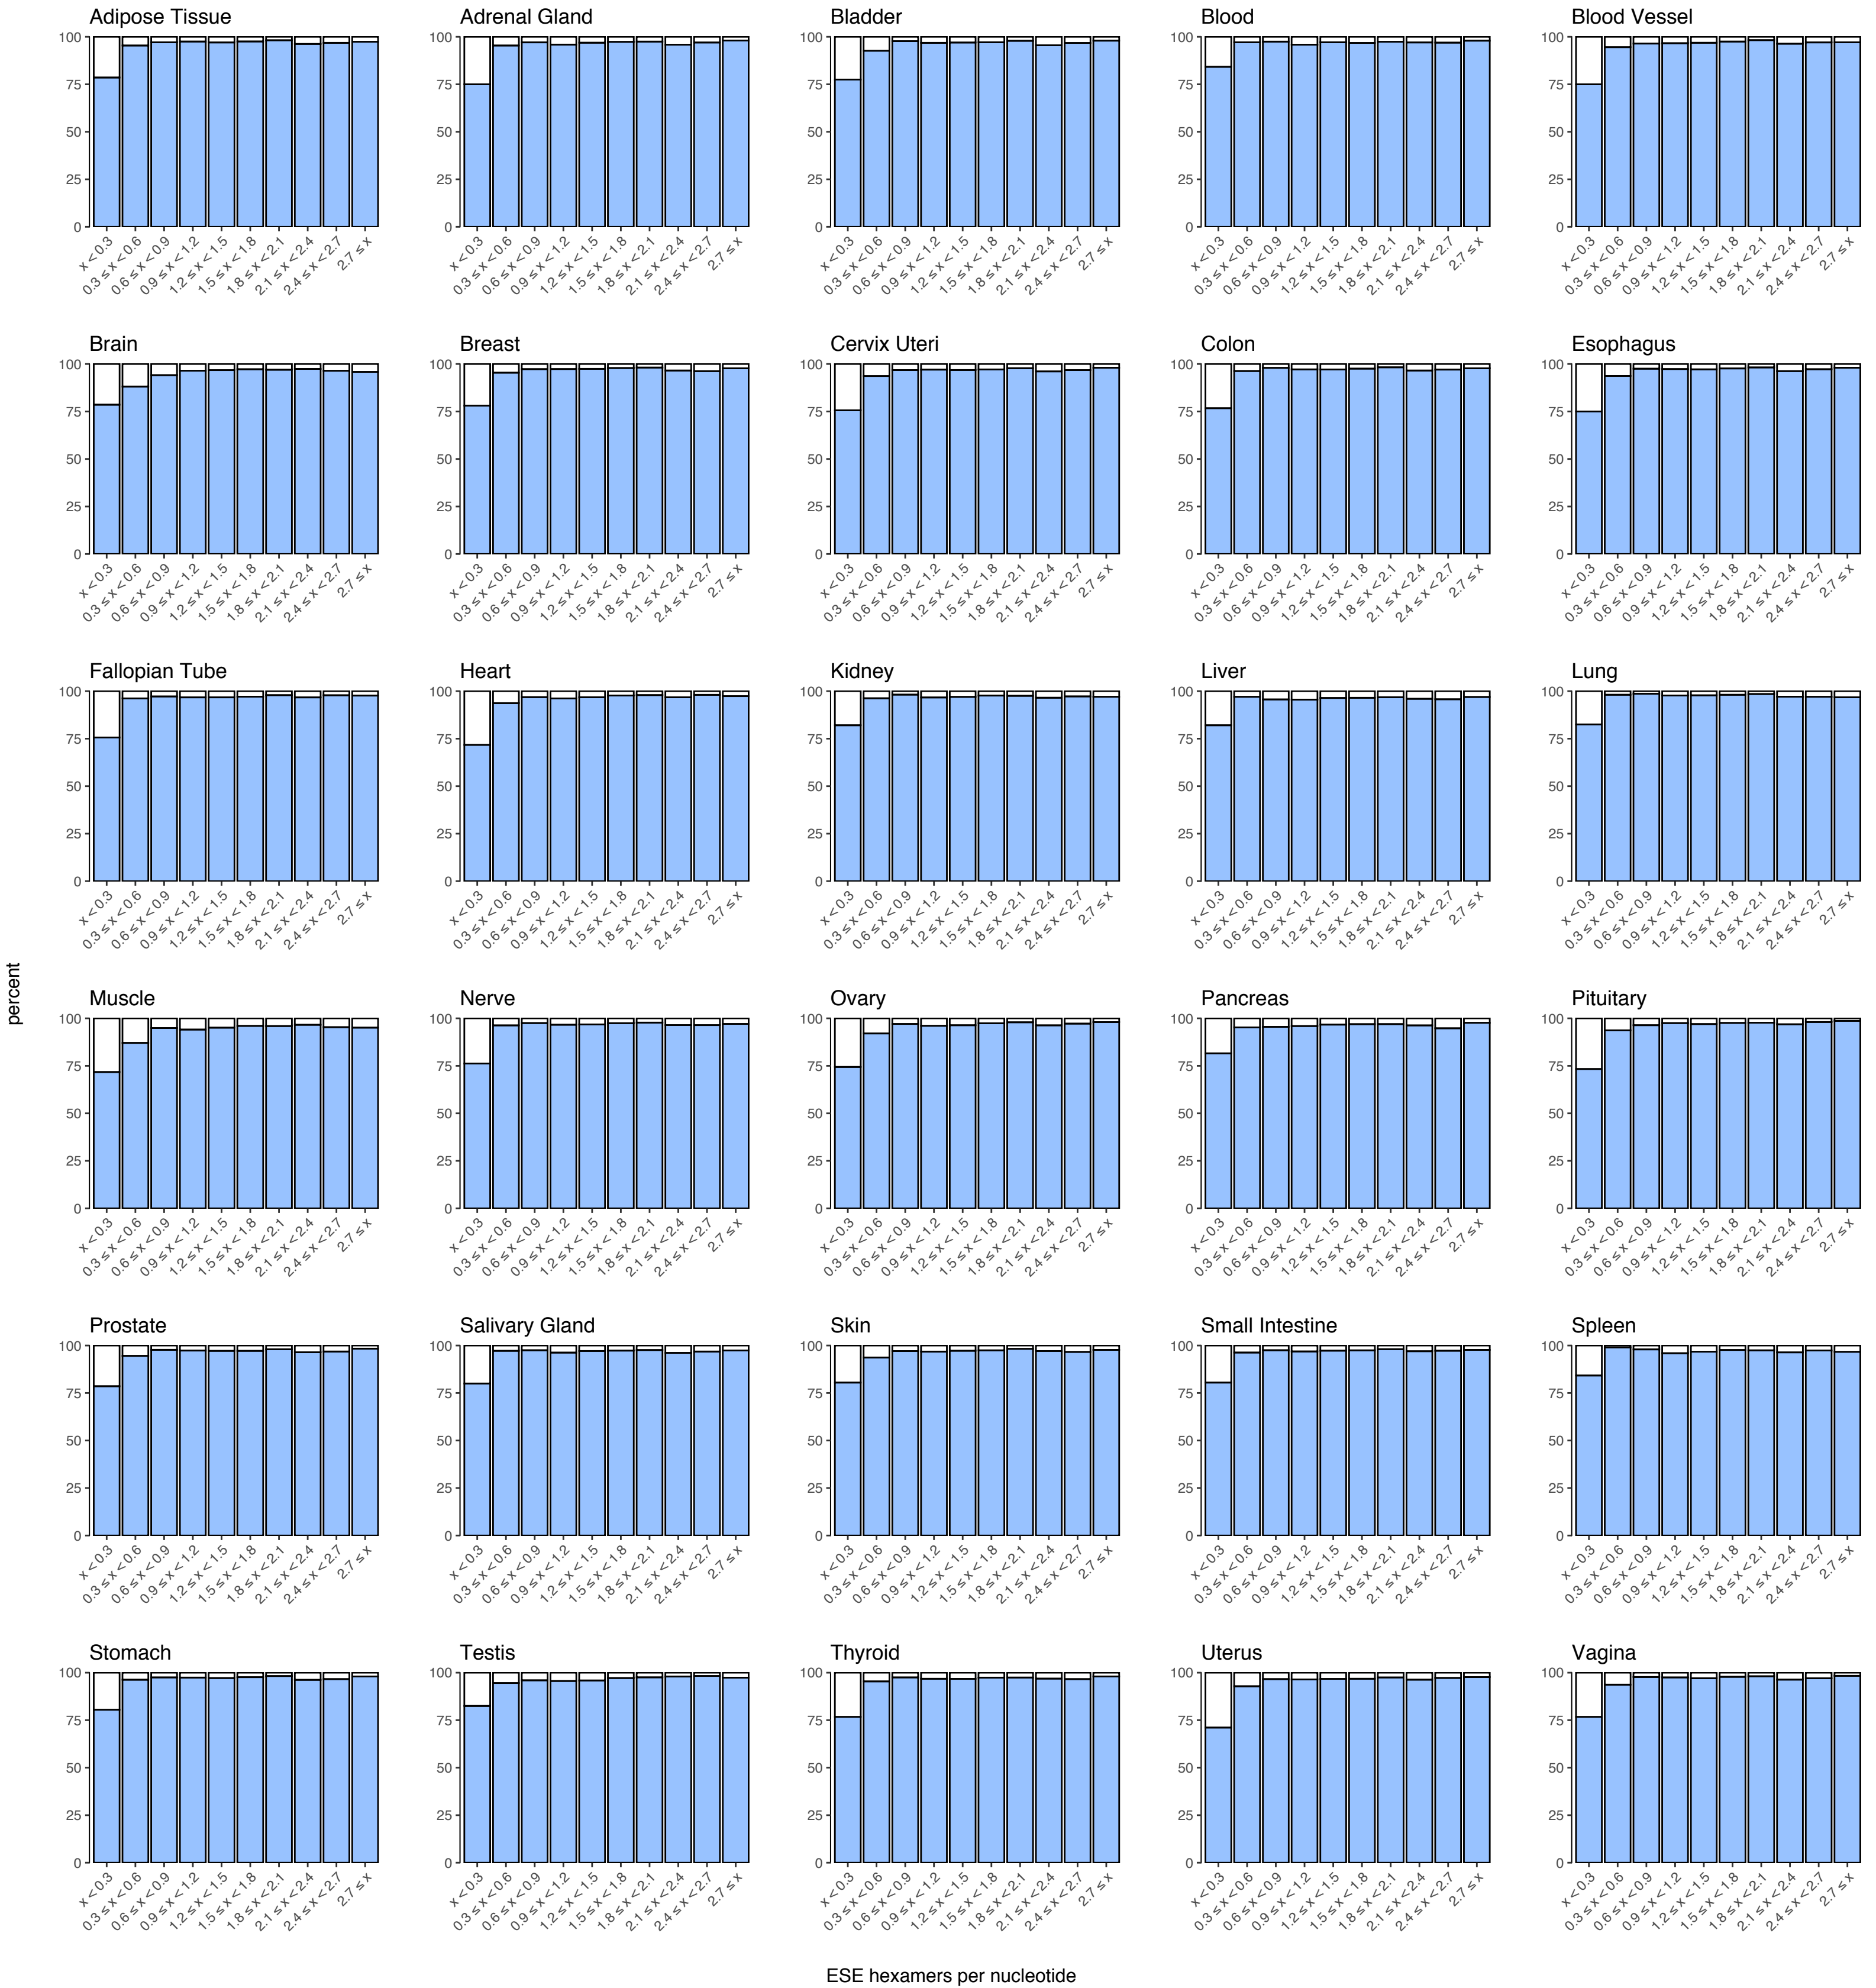

Supplement: supp [file elife-59959-supp-v1.zip]

**A**

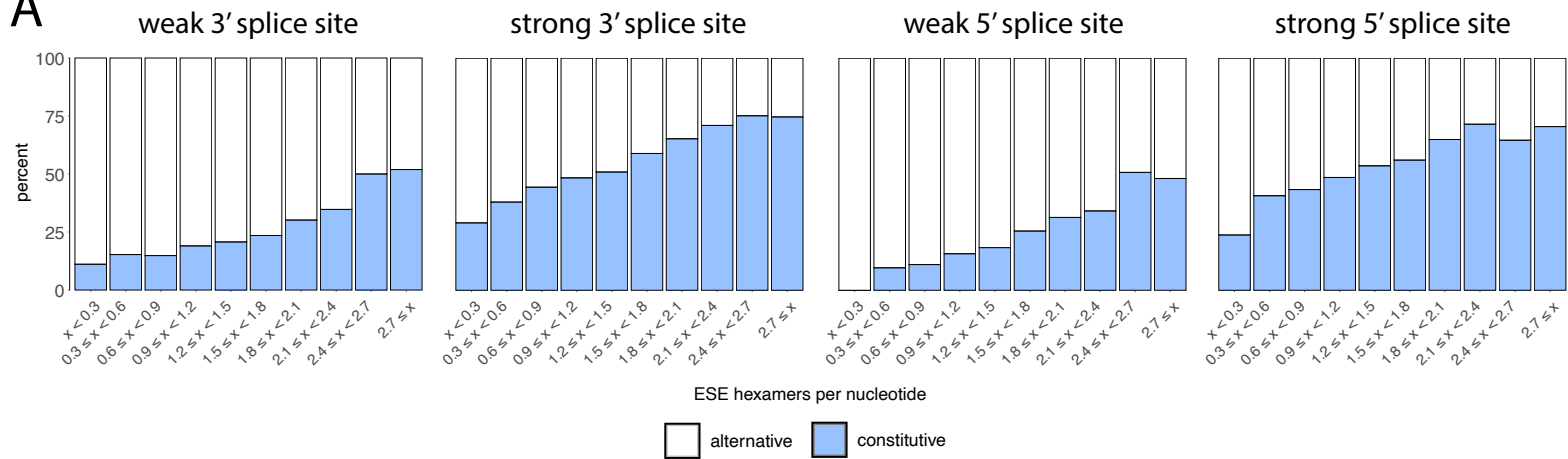

**B**

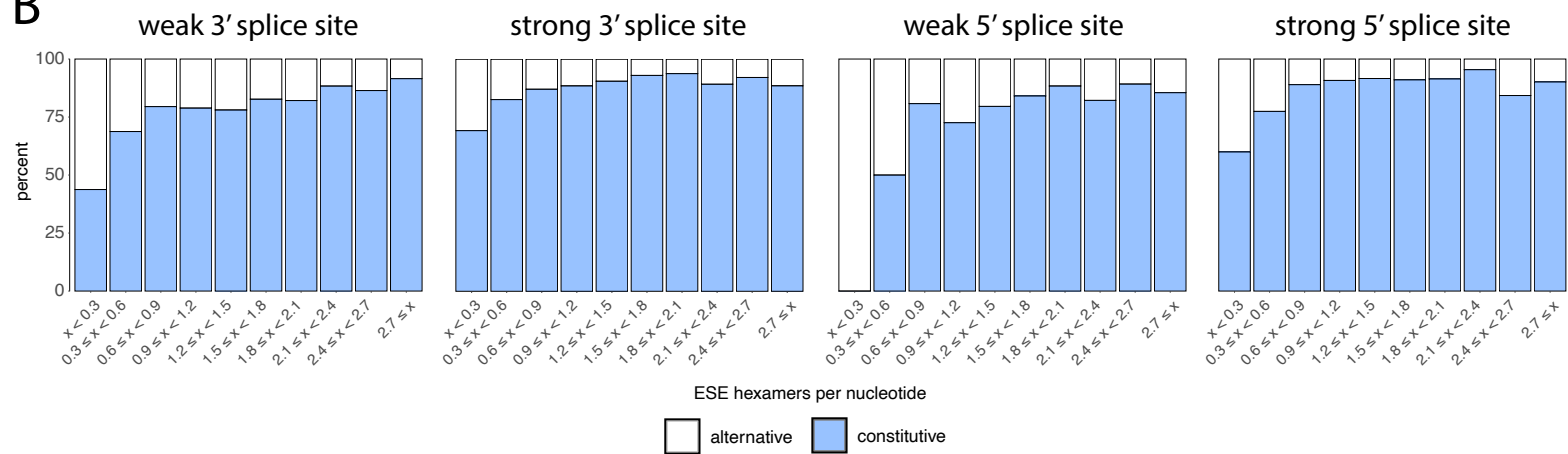

Supplement: supp [file elife-59959-supp-v1.zip]

**A**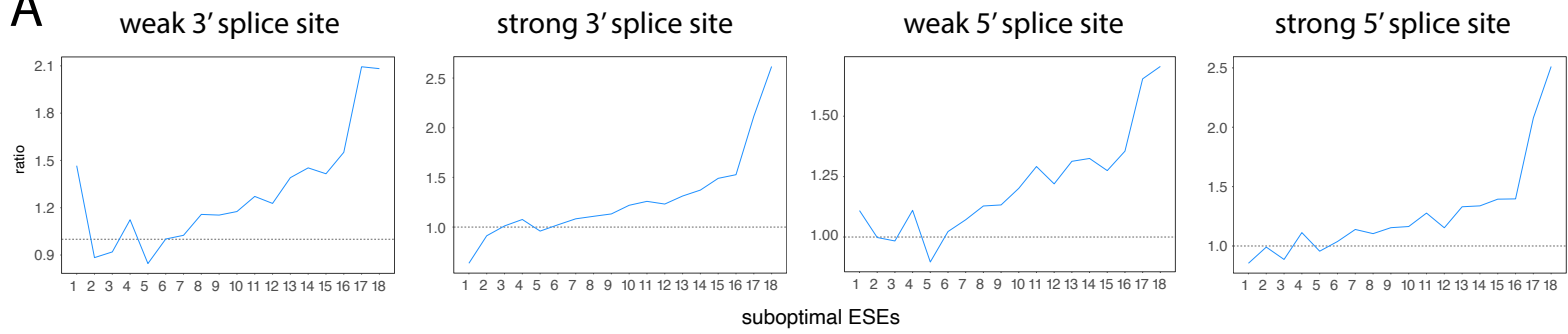**B**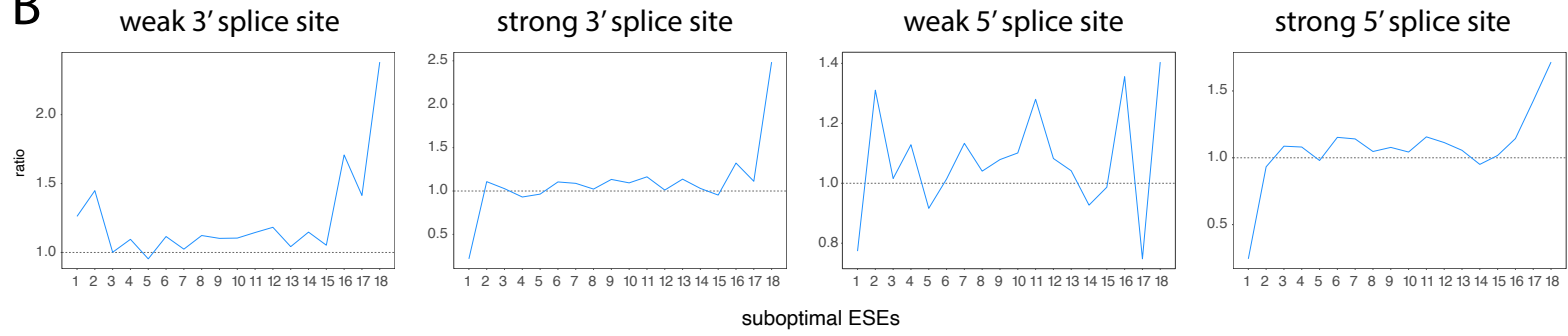

Supplement: supp [file elife-59959-supp-v1.zip]

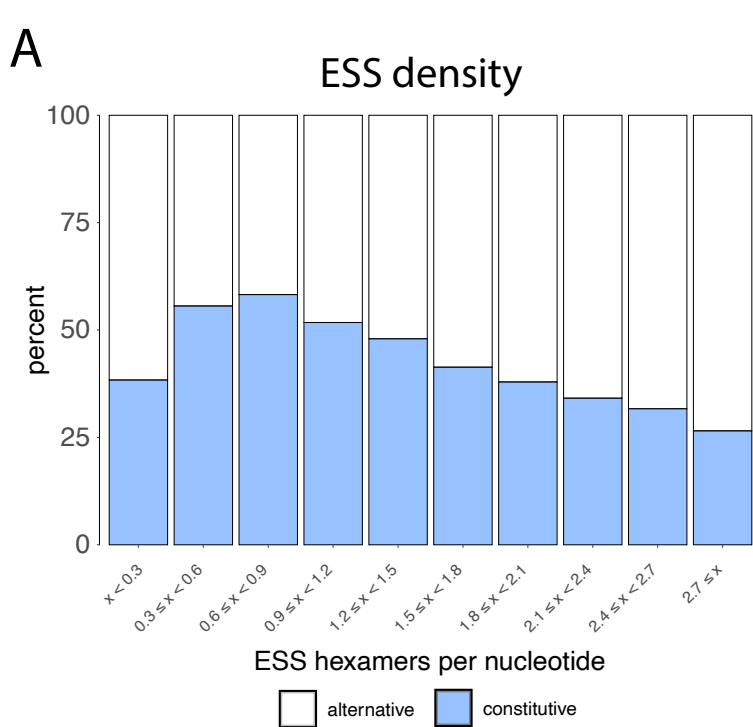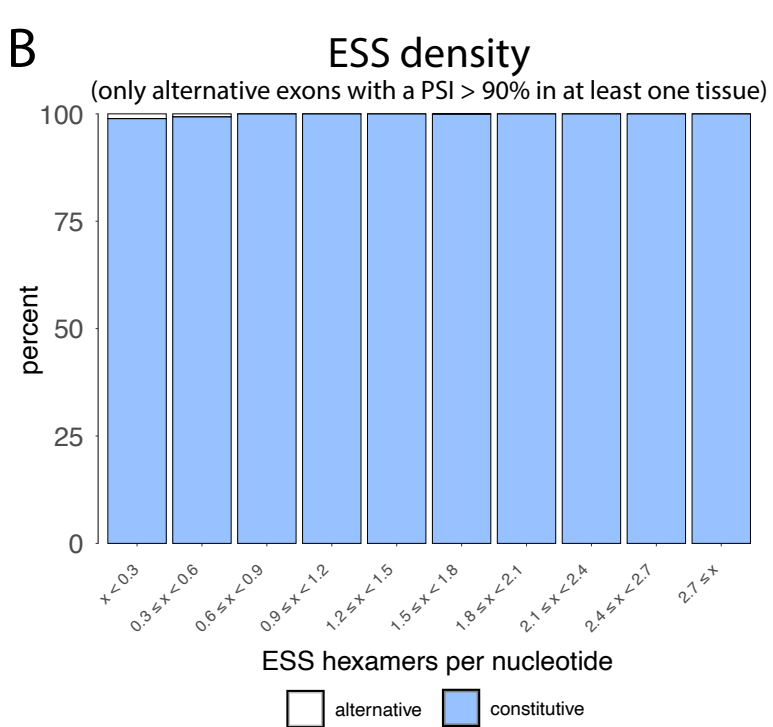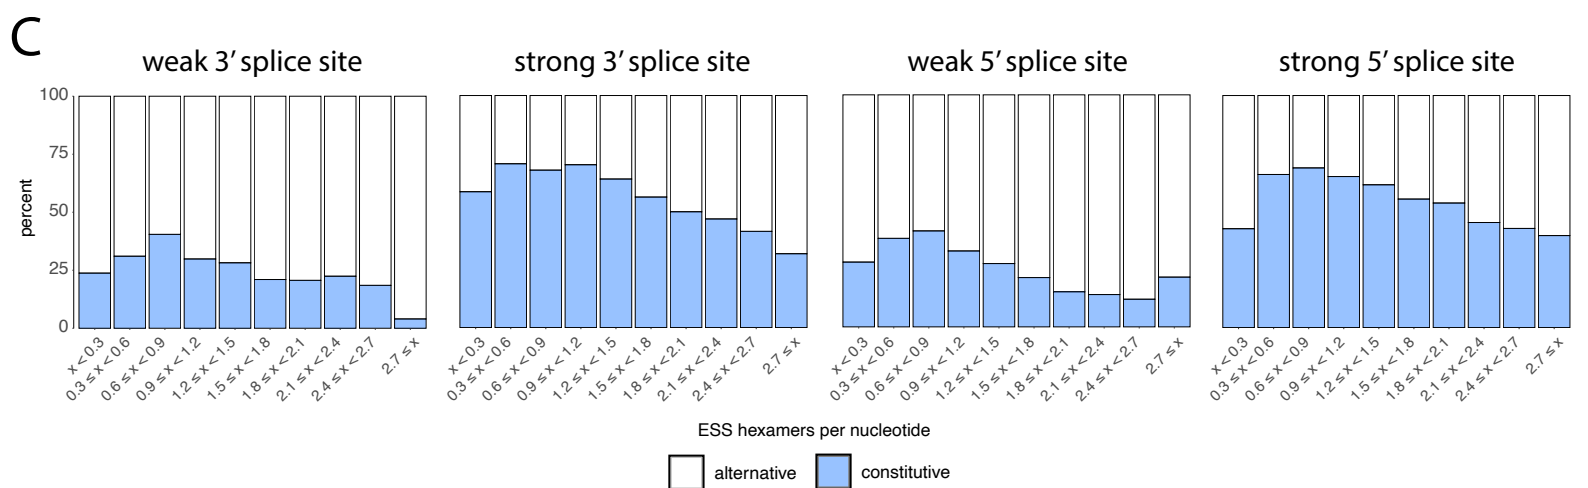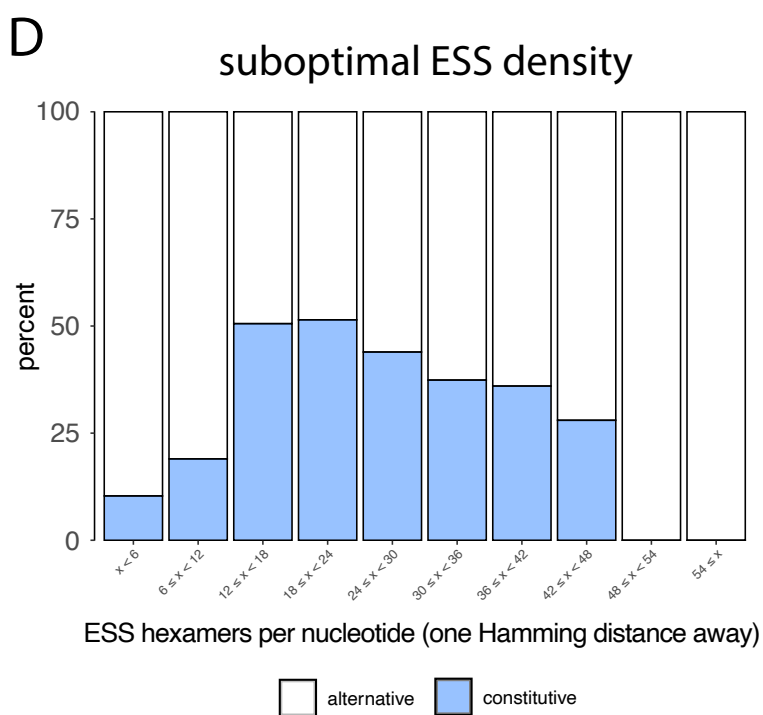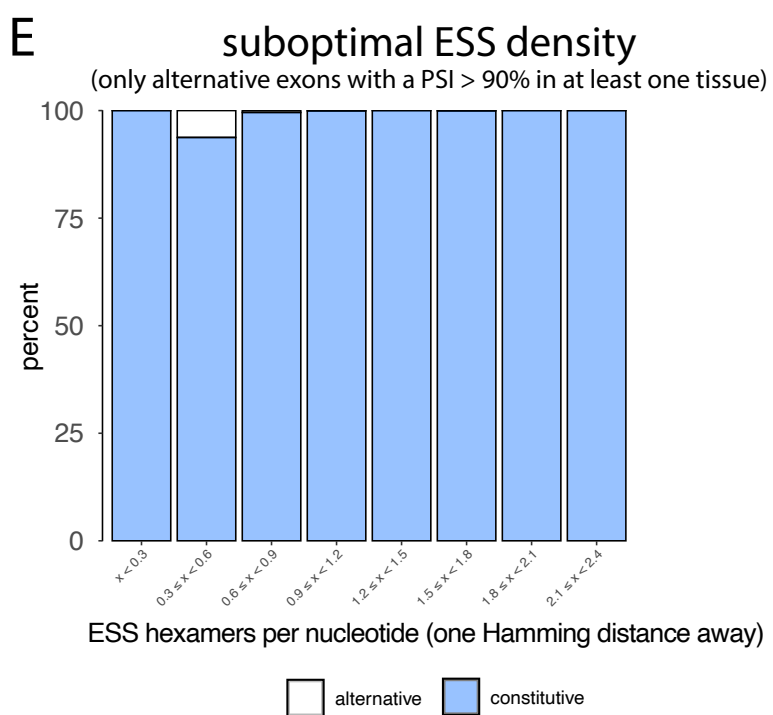

Supplement: supp [file elife-59959-supp-v1.zip]

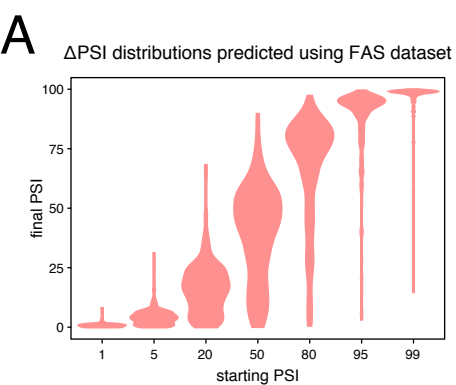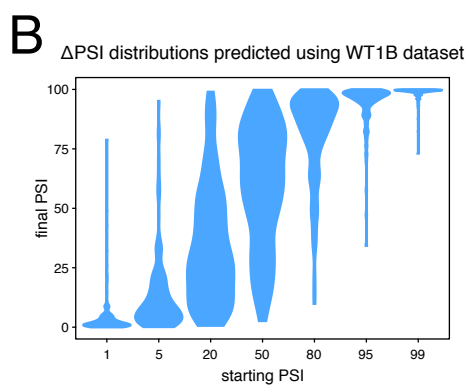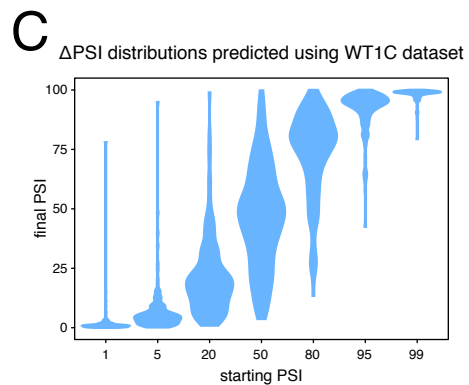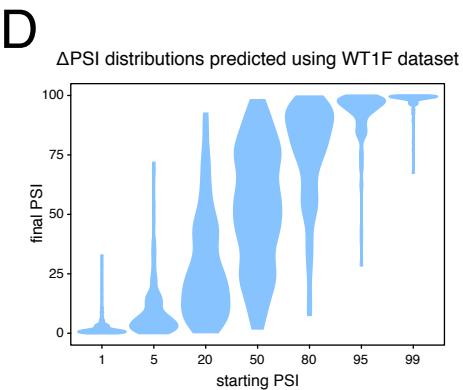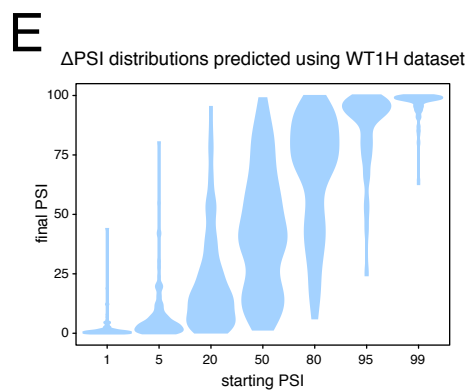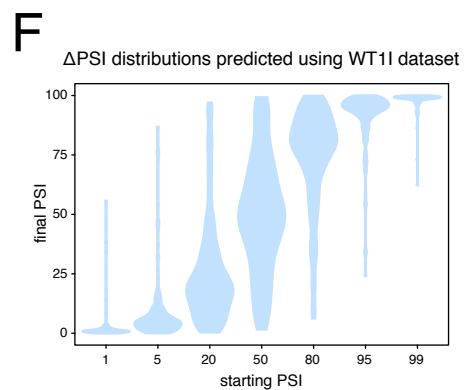

Supplement: supp [file elife-59959-supp-v1.zip › elife_poa_e59959_Figure_1_figure_supplement_1.pdf]

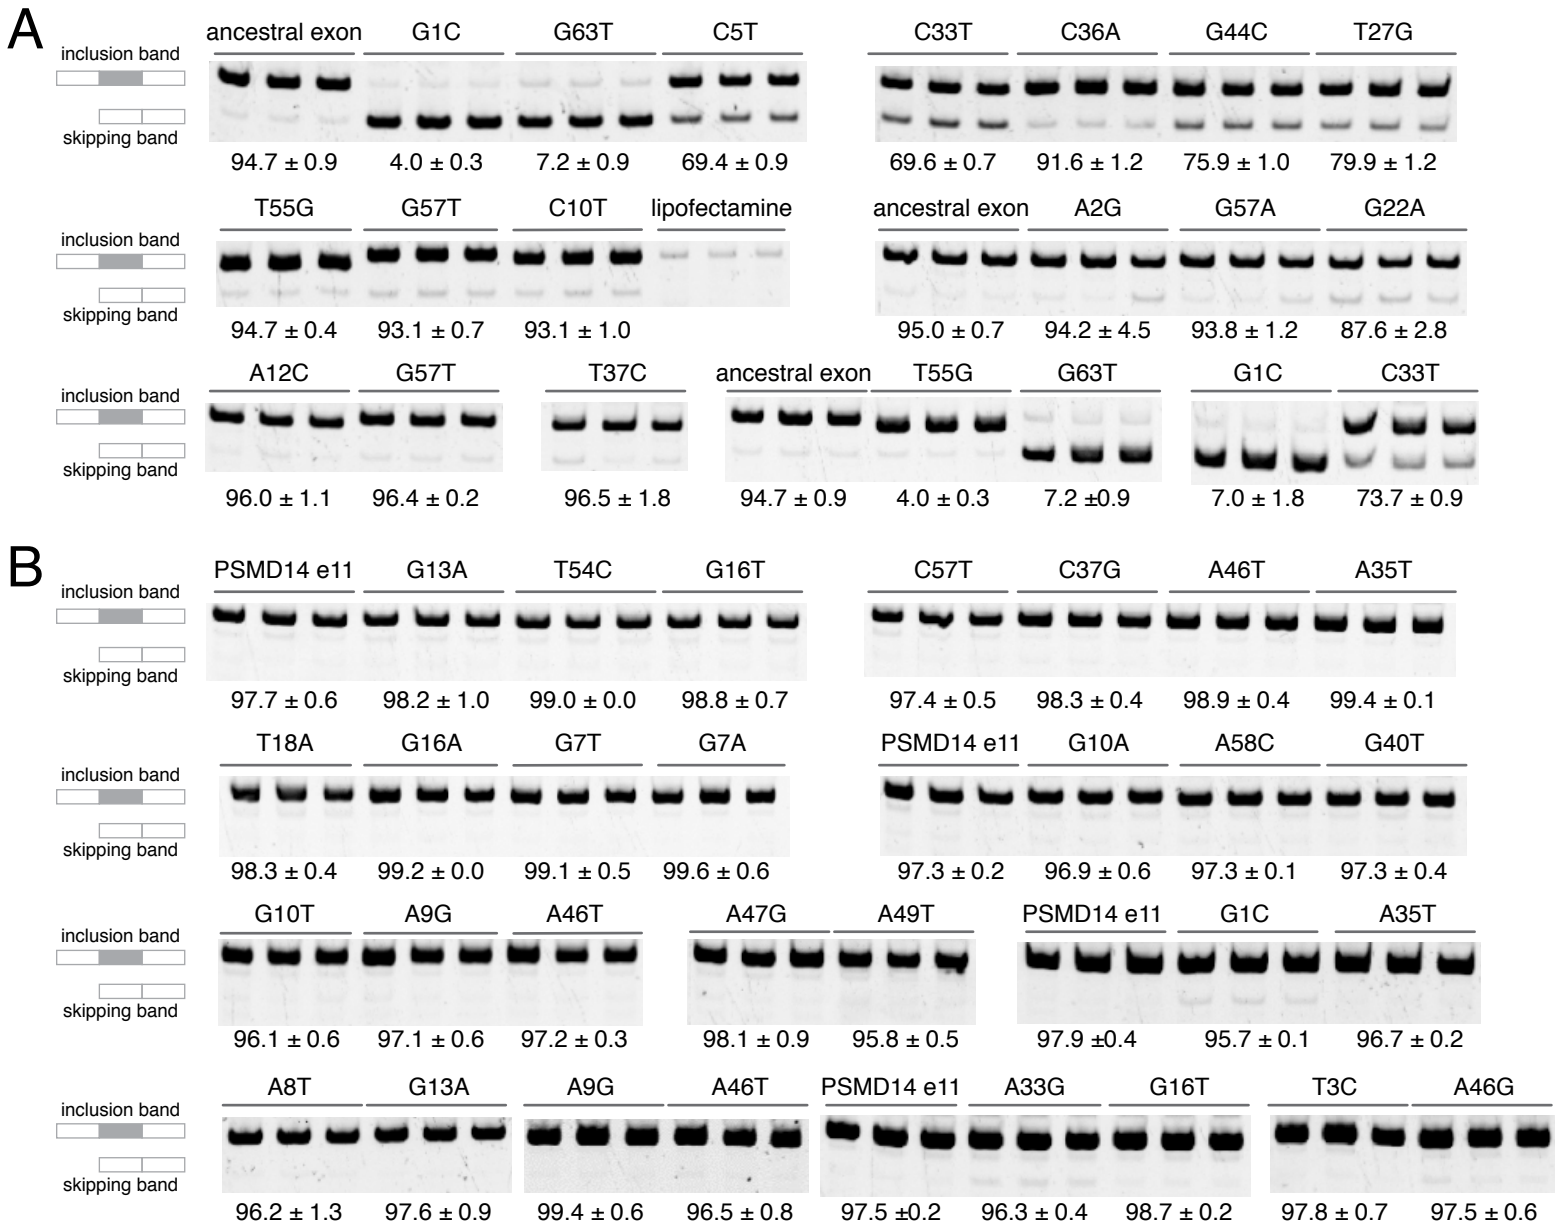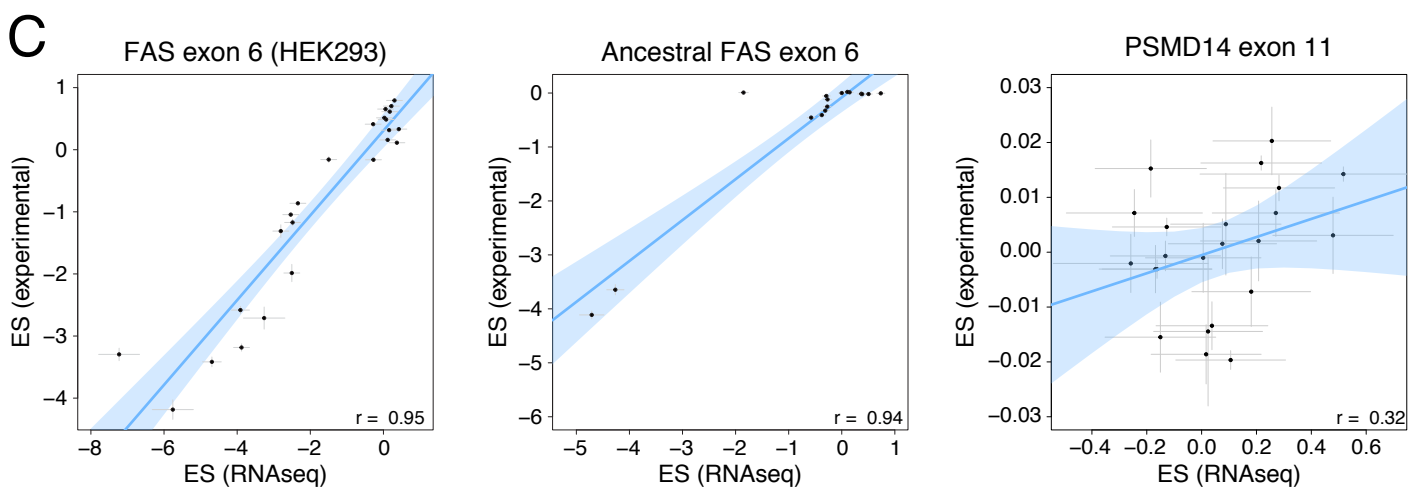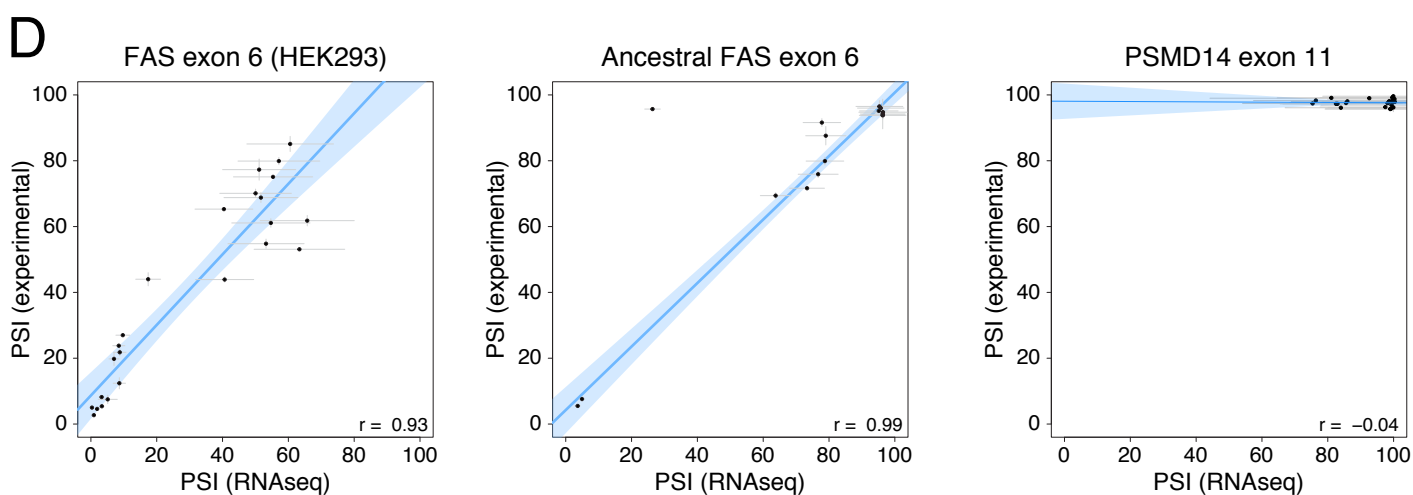

Supplement: supp [file elife-59959-supp-v1.zip › elife_poa_e59959_Figure_2_figure_supplement_1.pdf]

DPSI distributions at different starting PSI

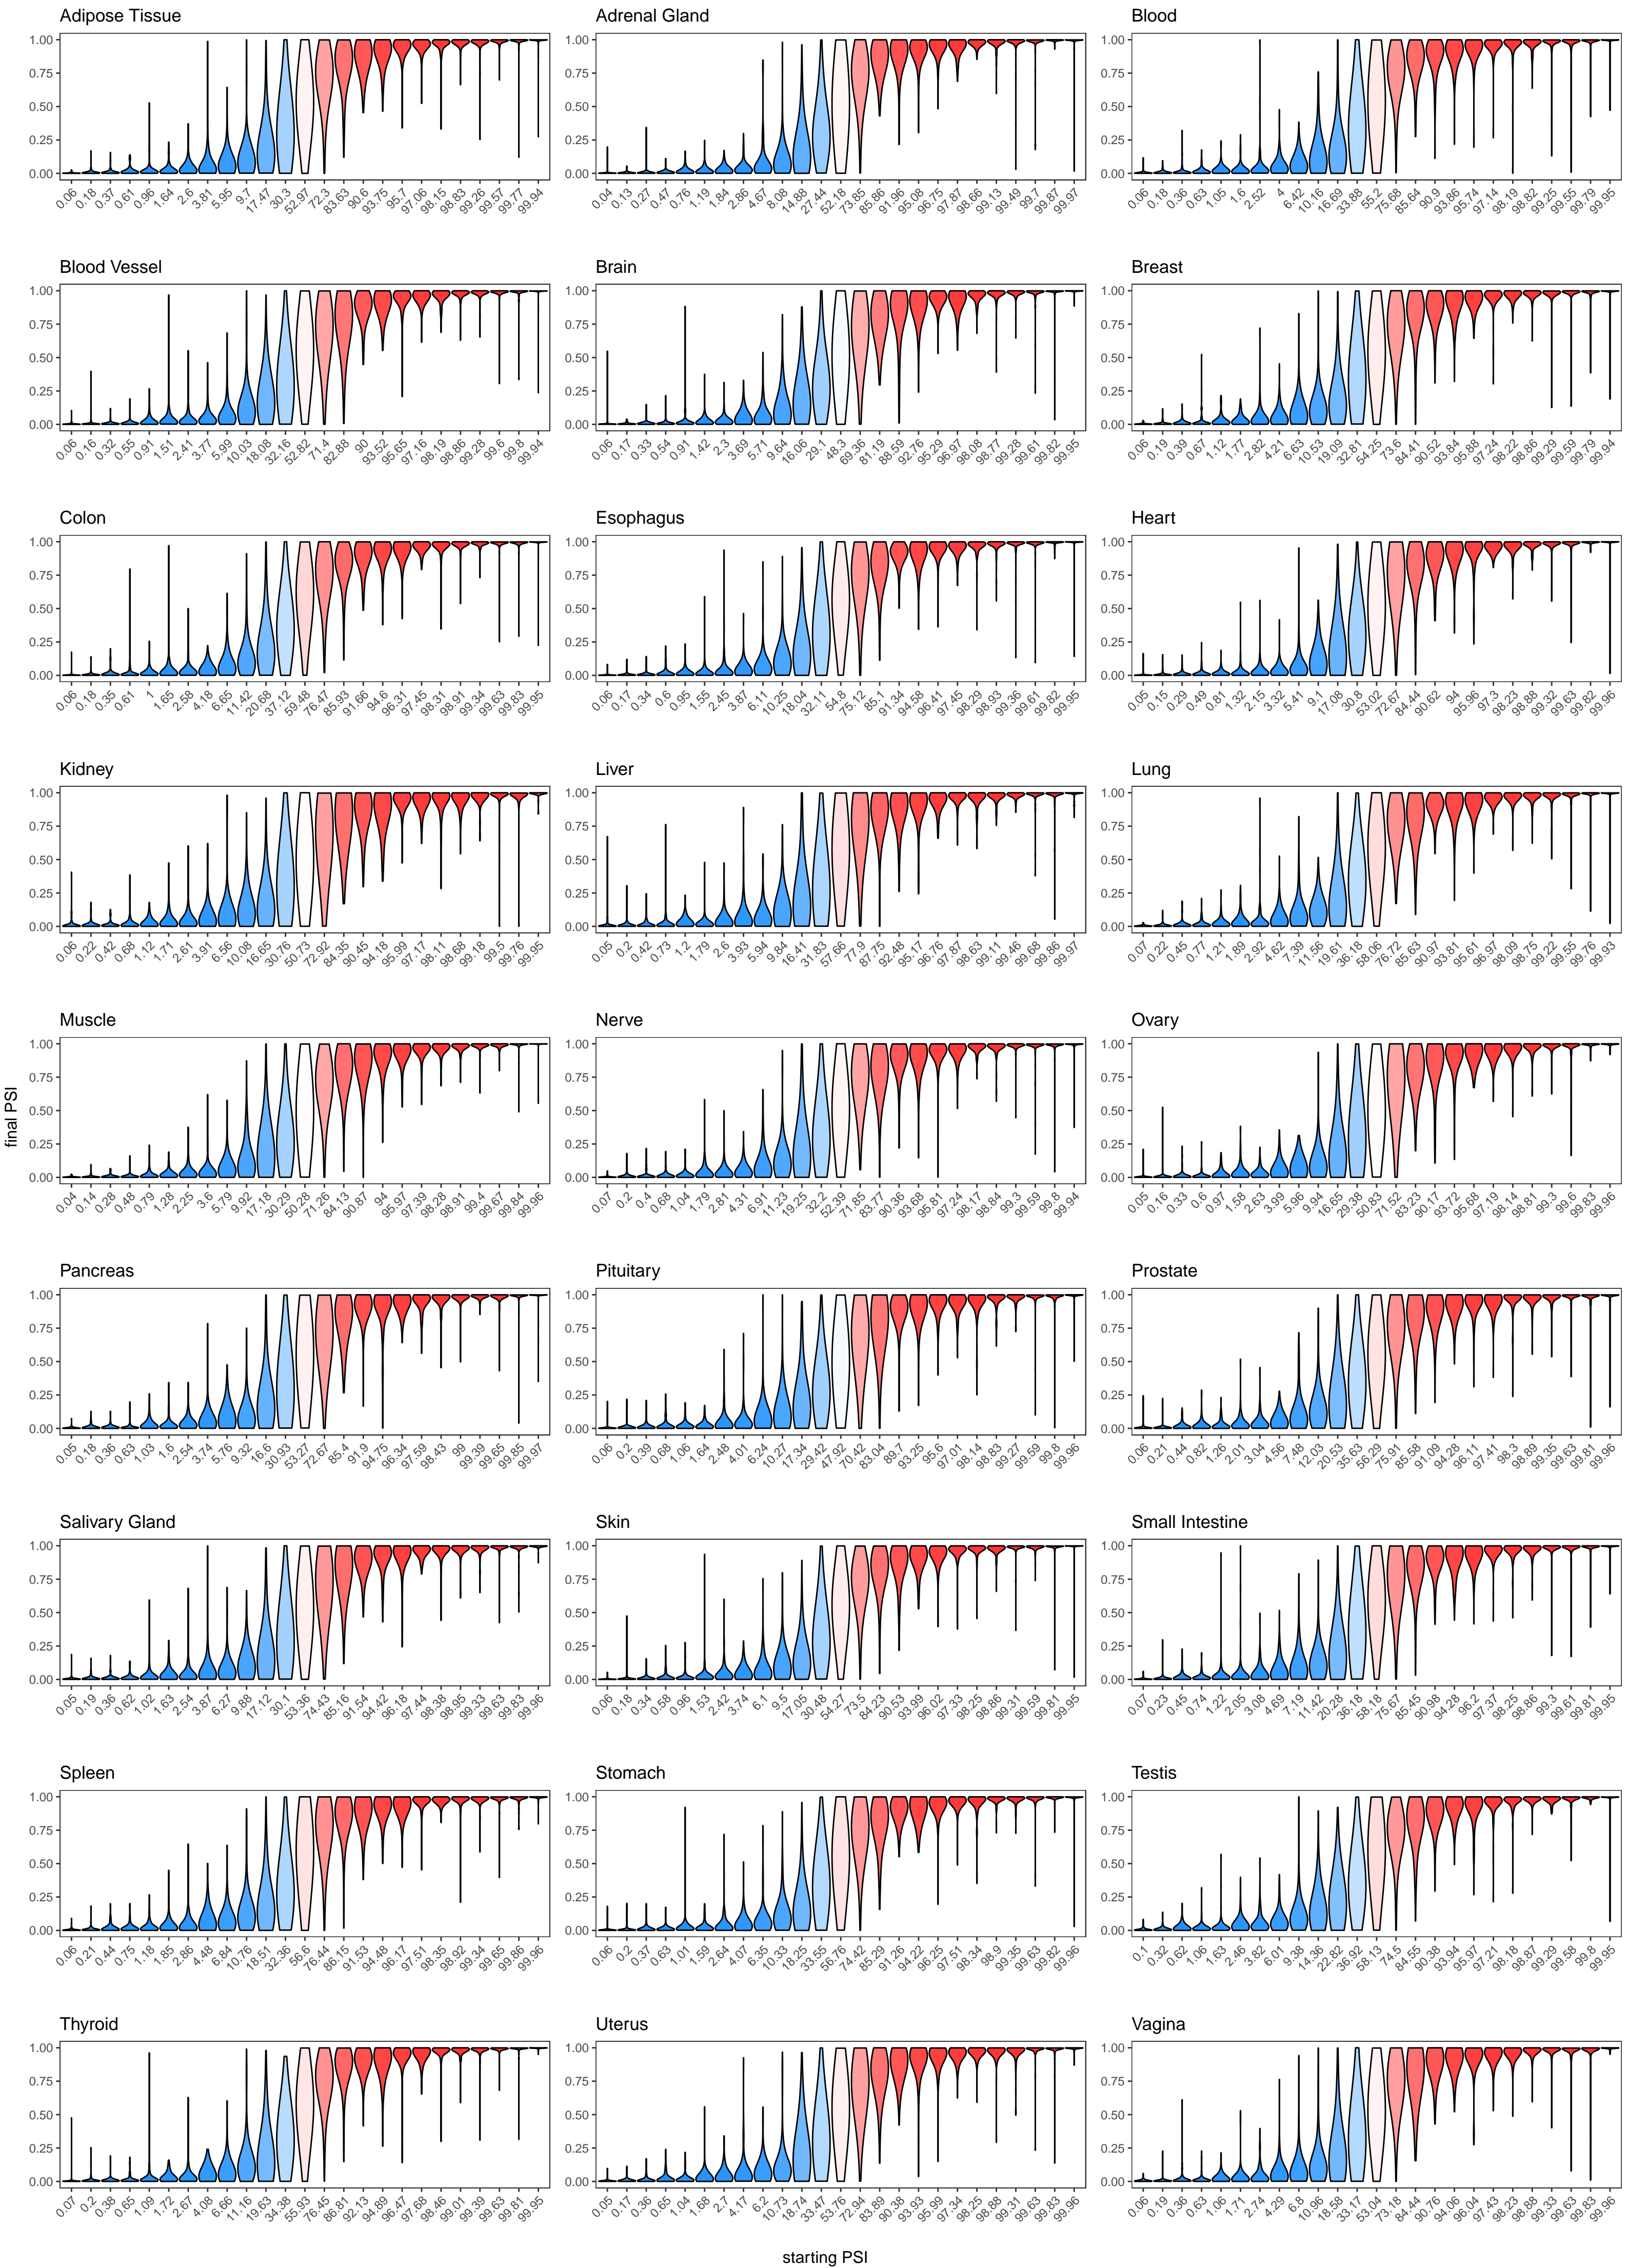

Supplement: supp [file elife-59959-supp-v1.zip › elife_poa_e59959_Figure_4_figure_supplement_1.pdf]

Delta PSI

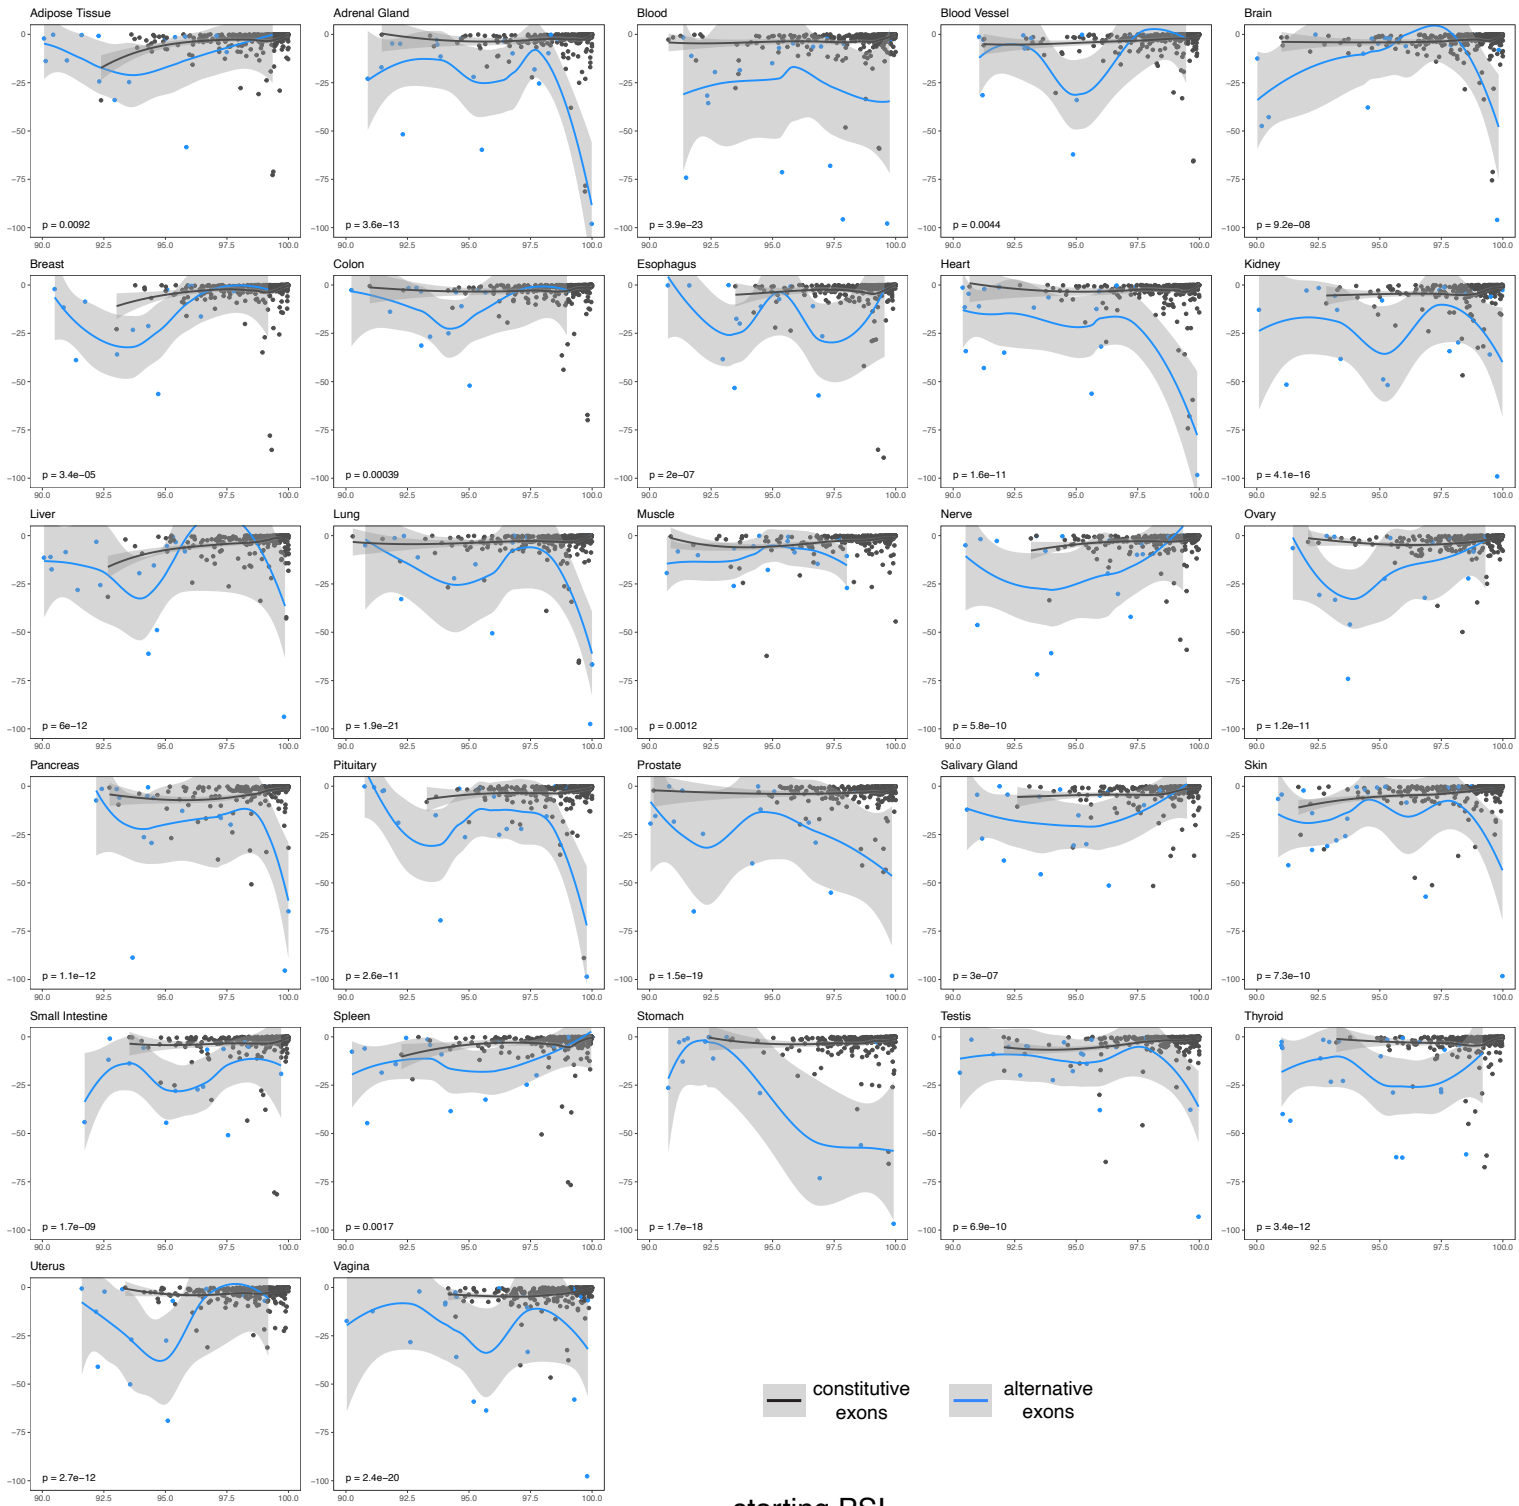

starting PSI

Supplement: supp [file elife-59959-supp-v1.zip › elife_poa_e59959_Figure_7_figure_supplement_1.pdf]

alternative exons with a PSI > 90% in at least one tissue

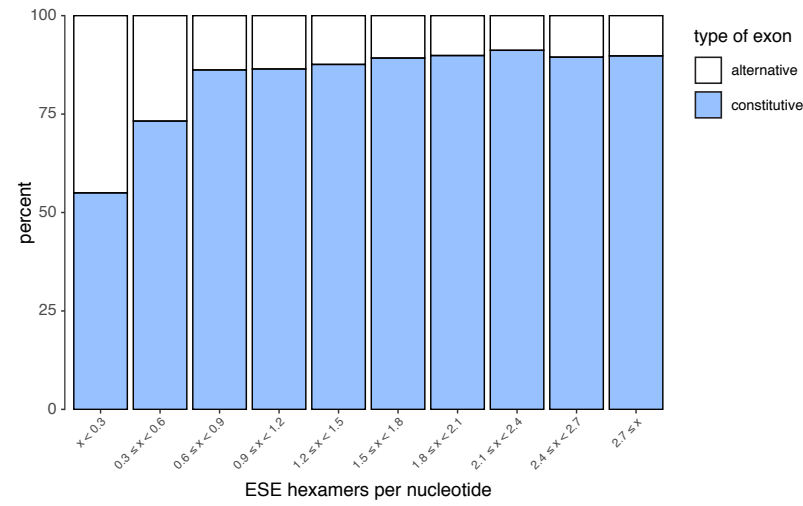

Supplement: supp [file elife-59959-supp-v1.zip › elife_poa_e59959_Figure_7_figure_supplement_4.pdf]
